## Title: **Distinct C<sub>4</sub> Sub-Types and C<sub>3</sub> Bundle Sheath Isolation In The Paniceae Grasses**

Short Title: C<sub>4</sub> Sub-Types In The Paniceae Grasses

Authors: Jacob D. Washburn<sup>1,2,\*</sup>, Josh Strable<sup>3</sup>, Patrick Dickinson<sup>4</sup>, Satya S. Kothapalli<sup>2</sup>, Julia M. Brose<sup>2</sup>, Sarah Covshoff<sup>4</sup>, Gavin C. Conant<sup>5</sup>, Julian M. Hibberd<sup>4</sup>, J. Chris Pires<sup>2</sup>

1) *Plant Genetics Research Unit, USDA-ARS, 302-A Curtis Hall, University of Missouri, Columbia, MO 65211 USA*

2) *Division of Biological Sciences, University of Missouri, 311 Bond Life Science Center, Columbia, MO 65211 USA*

3) *Department of Molecular and Structural Biochemistry, North Carolina State University, Raleigh, NC, USA 27695*

4) *Department of Plant Sciences, University of Cambridge, Downing Street, Cambridge CB2 3EA UK*

5) *Program in Genetics, Bioinformatics Research Center, Department of Biological Sciences, 356 Ricks Hall, North Carolina State University, Raleigh, NC, USA 27695*

\*Corresponding Author: Jacob D. Washburn (Jacob.Washburn@USDA.gov)

## 1 **Abstract**

2 In C<sub>4</sub> plants, the enzymatic machinery underpinning photosynthesis can vary, with, for example,  
3 three distinct C<sub>4</sub> acid decarboxylases being used to release CO<sub>2</sub> in the vicinity of RuBisCO. For  
4 decades, these decarboxylases have been used to classify C<sub>4</sub> species into three biochemical sub-  
5 types. However, more recently the notion that C<sub>4</sub> species mix and match C<sub>4</sub> acid decarboxylases  
6 has increased in popularity and, as a consequence, the validity of specific biochemical sub-types  
7 has been questioned. Using five species from the grass tribe Paniceae, we show that, while in  
8 some species transcripts encoding multiple C<sub>4</sub> acid decarboxylases accumulate, in others,  
9 transcript abundance and enzyme activity is almost entirely from one decarboxylase. In addition,  
10 the development of a bundle sheath isolation procedure for a close C<sub>3</sub> species in the Paniceae  
11 enables the preliminary exploration of C<sub>4</sub> sub-type evolution.

12

## 13 **Keywords**

14 C<sub>4</sub>, Photosynthesis, C<sub>4</sub> Sub-types, Evolution

15

## 16 Introduction

17 C<sub>4</sub> photosynthesis is often considered the most productive mechanism by which plants  
18 convert sunlight into chemical energy (Sage, 2004; Wang et al., 2012; Niklaus and Kelly, 2019;  
19 Kopriva and Weber, 2021). The C<sub>4</sub> pathway leads to increased photosynthetic efficiency because  
20 high concentrations of CO<sub>2</sub> are supplied to RuBisCO. Since its discovery in the 1960s (Hatch and  
21 Slack, 1966), a unified understanding of the biochemistry underpinning C<sub>4</sub> photosynthesis has  
22 emerged. This basic system comprises a biochemical pump that initially fixes HCO<sub>3</sub><sup>-</sup> into C<sub>4</sub> acids  
23 in mesophyll (M) cells. Subsequently, diffusion of these C<sub>4</sub> acids into a separate compartment,  
24 followed by their decarboxylation, generates high concentrations of CO<sub>2</sub> around RuBisCO. In  
25 many plants, the release of CO<sub>2</sub> occurs in bundle sheath (BS) cells (Hatch, 1992; Furbank, 2016;  
26 von Caemmerer et al., 2017). Although this pump demands additional ATP inputs, in warm  
27 environments where RuBisCO catalyzes high rates of oxygenation (and therefore  
28 photorespiration), the C<sub>4</sub> pathway increases photosynthetic efficiency compared with the  
29 ancestral C<sub>3</sub> state.

30 Elucidation of the C<sub>4</sub> pathway was initially based on analysis of sugarcane (*Saccharum spp.* L.)  
31 and maize (corn, *Zea mays* L.), which both use the chloroplastic NADP-DEPENDENT MALIC  
32 ENZYME (NADP-ME) to release CO<sub>2</sub> in BS cells. However, it became apparent that not all species  
33 used this chloroplastic enzyme. For example, *Megathyrsus maximus* (formerly *Panicum*  
34 *maximum*), *Urochloa texanum* (formerly *Panicum texanum*), and *Sporobolus poiretti* used the  
35 cytosolic enzyme PHOSPHONENOLPYRUVATE CARBOXYKINASE (PEPCK) (Edwards et al., 1971) to  
36 release CO<sub>2</sub> in the BS, whereas *Atriplex spongiosa* and *Panicum miliaceum* showed high activities  
37 of the mitochondrial NAD-DEPENDENT MALIC ENZYME (NAD-ME) (Hatch and Kagawa, 1974).

38 These findings led to the consensus that different C<sub>4</sub> species made preferential use of one C<sub>4</sub> acid  
39 decarboxylase and resulted in the classification of C<sub>4</sub> plants into one of three distinct biochemical  
40 pathways (Edwards et al., 1971; Hatch et al., 1975; Hatch and Kagawa, 1976). According to  
41 Furbank (2016), there was some early discussion about whether the sub-types were mutually  
42 exclusive or if one species might employ two or more sub-types together, but in general, the sub-  
43 types were described as distinct (Hatch, 1987).

44 For several decades this description of three sub-types has been standard practice (Sheen,  
45 1999; Hibberd and Covshoff, 2010) and even used in taxonomic classification (Brown, 1977).  
46 However, more recent work has provided evidence that some C<sub>4</sub> species use multiple C<sub>4</sub> acid  
47 decarboxylases. Maize, for example, was traditionally classified as using NADP-ME but evidence  
48 has mounted that it and sugar-cane both have high activities of PEPCK (Walker et al., 1997;  
49 Winkler et al., 1999; Majeran et al., 2010; Furbank, 2011; Pick et al., 2011; Bellasio and Griffiths,  
50 2013; Sharwood et al., 2014; Wang et al., 2014; Koteyeva et al., 2015; Weissmann et al., 2016;  
51 Cacefo et al., 2019). This blurring of the NADP-ME C<sub>4</sub> sub-type coincided with observations that  
52 many plants with high amounts of PEPCK also contained either NADP-ME or NAD-ME (Furbank,  
53 2011). Furthermore, computational models of the C<sub>4</sub> pathways suggested that BS energy  
54 requirements could not be met in a system with only PEPCK decarboxylation (Wang et al., 2014).  
55 It has therefore been suggested that PEPCK may never function on its own as a distinct sub-type  
56 (Furbank, 2011; Bräutigam et al., 2014; Wang et al., 2014).

57 Alternatives to the three sub-type classification have since been proposed and used in a  
58 number of recent publications. These include a two sub-type system (based on the use of NADP-  
59 ME or NAD-ME), as well as a four sub-type classification placing species into NADP-ME, NAD-ME,

60 NADP-ME + PEPCK, and NAD-ME + PEPCK sub-types (Wang et al., 2014; Washburn et al., 2015;  
61 Rao and Dixon, 2016). At present, none of these classification schemes has been widely adopted  
62 by the community. Moreover, convincing experimental evidence (i.e., transcriptomic, or  
63 proteomic data) that species traditionally defined as belonging to the PEPCK sub-type actually  
64 use another C<sub>4</sub> acid decarboxylation enzyme at a higher level than PEPCK is lacking, while enzyme  
65 activity measurements in the older literature indicate strong PEPCK predominance for several  
66 species (Gutierrez et al., 1974; Prendergast et al., 1987; Lin et al., 1993).

67 Only one group of species, the tribe Paniceae (Poaceae) has been documented to contain all  
68 three classical biochemical sub-types of C<sub>4</sub> photosynthesis together in a pattern consistent with  
69 a single C<sub>4</sub> origin (Sage et al., 2011). The subtribe Cenchrinae consists of species using the classical  
70 NADP-ME C<sub>4</sub> sub-type, the subtribe Melinidinae the PEPCK sub-type, and the Panicinae the NAD-  
71 ME sub-type (Gutierrez et al., 1974; Prendergast et al., 1987; Lin et al., 1993). The sub-tribes  
72 Cenchrinae, Melinidinae, and Panicinae (CMP) form a well-supported phylogenetic clade of C<sub>4</sub>  
73 species with many C<sub>3</sub> species sister to the clade (Vicentini et al., 2008; Grass Phylogeny Working  
74 Group II, 2012; Washburn et al., 2015). Studies based solely or predominantly on nuclear genes  
75 have confirmed this CMP clade, but also placed the sub-tribe Anthephorineae as sister to the  
76 CMPA clade. These phylogenies would create a CMPA clade of C<sub>4</sub> species potentially sharing a  
77 single C<sub>3</sub> ancestor (Vicentini et al., 2008; Washburn et al., 2017). This clade is here referred to as  
78 the CMP(A) clade in order to indicate the incongruence found between nuclear and chloroplast  
79 phylogenies (Figure 1). The analyses here performed would be equally valid regardless on the  
80 inclusion of Anthephorineae.

81 How and why C<sub>4</sub> photosynthesis and its sub-types evolved has been investigated for many  
82 years (Raghavendra, 1980; Rawsthorne, 1992; Sage, 2001; Sage, 2004; Langdale, 2011; Sage et  
83 al., 2012; Schluter and Weber, 2020). Current hypotheses suggest an intermediate C<sub>3</sub>-C<sub>4</sub> stage in  
84 which a photorespiratory pump operated (Sage, 2004; Sage et al., 2012; Heckmann et al., 2013;  
85 Mallmann et al., 2014; Bräutigam and Gowik, 2016; Blätke and Bräutigam, 2019). Each C<sub>4</sub> sub-  
86 type would require at least some distinct evolutionary innovations, and the question of how or  
87 why multiple sub-types would evolve from the same C<sub>3</sub> ancestor remains unanswered, although  
88 some evidence suggests it could be related to light quality and/or nutrient availability (Pinto et  
89 al., 2016; Sonawane et al., 2018; Blätke and Bräutigam, 2019; Arp et al., 2021).

90 To better determine whether the PEPCK pathway represents a true biochemical sub-type and  
91 investigate the extent to which C<sub>4</sub> species make use of mixtures of C<sub>4</sub> acid decarboxylases, global  
92 patterns of mRNA abundance were assessed from BS and M enriched samples across  
93 phylogenetically spaced C<sub>4</sub> plants that were traditionally defined as exclusively using one of each  
94 of the C<sub>4</sub> sub-types. These species belong to each subtribe of the CMP(A) described above. The  
95 C<sub>3</sub> species *Sacciolepis indica*, another member of the Paniceae and sister to the CMP(A) clade  
96 (sister to CMP in chloroplast phylogeny and sister to CMPA in nuclear phylogeny), was included  
97 in the analysis to provide insight into the ancestral state and evolutionary transition from C<sub>3</sub> to  
98 different C<sub>4</sub> sub-types (Washburn et al., 2015; Washburn et al., 2017). A simple method was  
99 developed for isolating bundle sheath cells from the C<sub>3</sub> species *Sacciolepis indica*.

100 We find that at least one species in the tribe appears to use PEPCK decarboxylation exclusively  
101 or nearly so, while the other species examined appear to be of mix subtype. Analysis of the C<sub>3</sub>  
102 species *S. indica* shows low levels of C<sub>4</sub> transcripts and an amenability to mechanical bundle

103 sheath separation procedures not previously seen in C<sub>3</sub> species. These observations lead us to  
104 hypothesize that *S. indica* may lie somewhere on the spectrum of C<sub>3</sub>-C<sub>4</sub> intermediates or  
105 represent a reversion from an ancestral C<sub>3</sub>-C<sub>4</sub> intermediate.

106

## 107 **Results**

### 108 **M And BS Extraction And Distribution Of Transcripts Encoding The Core C<sub>4</sub> Cycle**

109 Four C<sub>4</sub> species from the Paniceae tribe were chosen to represent the CMP(A) subtribes in the  
110 Paniceae (Figure 1). *Setaria italica* for Cenchrinae (NADP-ME), *Urochloa fusca* for Melinidinae  
111 (PEPCK), *Panicum hallii* for Panicinae (NAD-ME), and *Digitaria californica* for Antheophorineae  
112 (NADP-ME). *Sacciolepis indica* was chosen to represent the closest C<sub>3</sub> relative to the group.

113 Microscopic examination of leaves of *S. italica*, *U. fusca*, *P. hallii* and *D. californica*, from which  
114 M cell contents had been extracted, showed bands of cells containing low chlorophyll content  
115 (Figure 2A-D) a phenotype consistent with efficient removal of M content (Covshoff et al., 2013;  
116 John et al., 2014). In addition, after mechanical isolation of leaves, BS preparations of high purity  
117 for all C<sub>4</sub> species were generated (Figure 2A-D). Separation of BS strands was also successful for  
118 the C<sub>3</sub> species *Sacciolepis indica*, something that to our knowledge has not been successful in any  
119 other C<sub>3</sub> species (Figure 2E). Analysis of transcripts derived from core C<sub>4</sub> genes showed clear  
120 differences in abundance between M and BS samples from the C<sub>4</sub> species. For example,  
121 transcripts derived from *CARBONIC ANHYDRASE (CA)*, *PHOSPHOENOLPYRUVATE CARBOXYLASE*  
122 (*PEPC*) and *PYRUVATE, ORTHOPHOSPHATE DIKINASE (PPDK)* genes preferentially accumulated in  
123 M cells (Figure 3A). In contrast, transcripts derived from the *RUBISCO SMALL SUBUNIT (RBCS)* and  
124 *RUBISCO ACTIVASE (RCA)* as well as either *NADP-ME*, *NAD-ME* or *PEPCK* were more abundant in

125 BS strands (Figure 3B). The abundance of transcripts relating to C<sub>4</sub> photosynthesis in the C<sub>3</sub>  
126 species *S. indica* were also consistent with current knowledge of metabolism in the BS of C<sub>3</sub>  
127 species. For example, RBCS and RCA were more abundant in whole leaf samples than in the BS.

128

### 129 **Some Paniceae Lineages Use Classical Sub-Types and Others Mix C<sub>4</sub> Acid Decarboxylases**

130 *Setaria italica*, classically considered an NADP-ME sub-type species, showed high transcript  
131 levels for *NADP-ME* and *NADP-MDH* in BS and M cells respectively (Figure 4A). In addition,  
132 consistent with the *NADP-ME* sub-type, in BS strands of *S. italica* transcripts encoding *PEPCK*,  
133 *NAD-ME*, *NAD-MDH*, *ASP-AT*, and *ALA-AT* were detected at low levels. Enzyme activity assays also  
134 indicated high levels of NADP-ME in *S. italica* (Figures 5 and 6). Surprisingly high levels of PEPCK  
135 enzyme activity were also found in *S. italica*, but this was not the case for *PEPCK* transcripts. This  
136 may be explainable by the differences in growth chamber conditions, though slight, between RNA  
137 samples and enzyme activity samples or an alternate protein may have generated this activity.

138 *Urochloa fusca* is classically thought to exclusively use *PEPCK* to release CO<sub>2</sub> in the BS. The  
139 patterns of transcript accumulation in M and BS strands of *U. fusca* are consistent with *PEPCK*  
140 functioning in this species with very little to no supplemental decarboxylation from either *NADP-*  
141 *ME* or *NAD-ME* (Figure 4B). BS stands contained barely detectable levels of transcripts encoding  
142 *NADP-ME* and *NAD-ME*, but very high levels of those encoding *PEPCK*. Enzyme activity in *U. fusca*  
143 was consistent with transcript abundances, PEPCK having high levels and the other two  
144 decarboxylases very low levels (Figures 5 and 6). In addition, consistent with the cycling of  
145 aspartate and alanine between the two cell-types, transcripts derived from genes encoding both  
146 *ASP-AT* and *ALA-AT* were detectable in the two cell-types (Figure 4B).



147 In contrast to the above analysis of *S. italica* and *U. fusca* which seem to fit with an exclusive  
148 use of one decarboxylation enzyme, analysis of *P. hallii* and *D. californica* indicated they  
149 potentially use multiple C<sub>4</sub> acid decarboxylases during photosynthesis (Figure 4C-D). Although *P.*  
150 *hallii* is classically considered to use *NAD-ME* in addition to high levels of transcripts encoding  
151 *NAD-ME*, *NAD-MDH*, *ASP-AT* and *ALA-AT*, unexpectedly high levels of transcripts encoding *NADP-*  
152 *ME* were detected in the BS (Figure 4C). *NAD-ME* transcript levels were still more than twice  
153 those of *NADP-ME*, and the enzyme assays found much higher relative levels of *NAD-ME* than  
154 *NADP-ME* (Figures 5 and 6). In the case of *Digitaria californica* which is thought to belong to the  
155 *NADP-ME* sub-type, although transcripts encoding *NADP-ME* and *NADP-MDH* were abundant in  
156 BS and M samples respectively, *PEPCK* levels were more than double those of *NADP-ME* in the  
157 BS (or perhaps the levels are similar if one considers the possibility that both *NADP-ME* genes  
158 here mapped are resulting in similar functional products). Enzyme assay results showed high  
159 levels of *NADP-ME* and much lower levels of *PEPCK* consistent with the traditional subtype  
160 classification of this species (Figures 5 and 6).

161 To further confirm or refute these findings RNA *in situ* hybridizations were undertaken.  
162 Transcript accumulation by *in situ* hybridization experiments were consistent in signal strength  
163 with the RNA-seq results from above and indicated that the signals clearly localized to the  
164 expected anatomical locations (Supplemental Figure 1). Previous enzyme assay results for species  
165 closely related to the ones sampled here are also extremely consistent with the RNA-Seq results  
166 (Supplemental Figure 2). It should be noted that the conditions for mRNA, *in situ*, and enzyme  
167 assay sample collection were not identical (see Materials and Methods and  
168 Discussion sections).

169

#### 170 **C<sub>4</sub> Pathway Transporters**

171 The transcript abundance of various transporters related to C<sub>4</sub> photosynthesis were examined.  
172 Some transporters had low or undetectable levels such as *DICARBOXYLATE TRANSPORTER 1*  
173 (*DIT1*). Others, such *SODIUM BILE ACID SYMPORTER 2 (BASS2)*, *SODIUM:HYDROGEN*  
174 *ANTIporter (NHD)*, *MITOCHONDRIAL DICARBOXYLATE CARRIER (DIC)*, and  
175 *PHOSPHATE/PHOSPHOENOLPYRUVATE TRANSLOCATOR (PPT)*, had variable levels of transcript  
176 abundance across the species.

177

#### 178 **C<sub>4</sub> Transcript Abundance Levels In The Closest C<sub>3</sub> Relative To The MPC(A) Clade**

179 Transcript abundance levels from *S. indica*, a C<sub>3</sub> species that is part of the most closely related  
180 out group to the CMP(A) clade, were generally consistent with expectations for a C<sub>3</sub> species  
181 (Figures 3 and 7). RBCS and RCA are more highly expressed in whole leaf tissue than in BS  
182 extracts. Transcripts related to C<sub>4</sub> photosynthesis are also expressed at a low level in both whole  
183 leaf and BS.

184 Comparisons between the *S. indica* (C<sub>3</sub>) BS enriched and whole leaf samples showed significant  
185 (adjusted p-value < 0.001) BS over-abundance for 912 gene models and whole leaf (WL) over-  
186 abundance for 746 gene models (Supplemental Table 1). Of these over-abundant genes,  
187 significant Gene Ontology (GO) enrichment (adjusted p-value < 0.05) was found for 16 different  
188 GO terms for the BS, and 14 GO terms for the M (Supplemental Table 1). The different GO terms  
189 enriched in BS cells related to diverse processes including cellular transport, molecular binding,

190 and cell wall and membrane components. The WL GO terms related to photosystems I & II,  
191 photosynthesis, and other processes (Supplemental Table 1).

192

### 193 **Gene Expression in C<sub>3</sub> versus C<sub>4</sub> Bundle Sheath Cells**

194 The experimental design provides the opportunity to compare the BS expression from a C<sub>3</sub>  
195 species against BS expression in four closely related C<sub>4</sub> species. A total of 357 gene models  
196 displayed significantly ( $p_{adj} < 0.001$ ,  $\log_2$  fold change  $> 2$ ) higher transcript abundance levels over  
197 the C<sub>3</sub> BS in all four C<sub>4</sub> species in the analysis (Supplemental Table 2). Many of these genes are  
198 expected, such as photosystem I and II subunits, cytochrome b<sub>6</sub>f, cyclic electron chain proteins,  
199 Calvin cycle proteins, cellulose synthase, *Pectinacetyltransferase*, starch synthase, and others. The  
200 remaining genes are potential candidates involved in C<sub>4</sub> photosynthesis that deserve further  
201 molecular and biochemical investigation (Supplemental Table 2).

202

## 203 **Discussion**

### 204 **The PEPCK Sub-Type**

205 The dominance of *PEPCK* transcript and enzyme activity over *NADP-ME* and *NAD-ME* in *U.*  
206 *fusca* provides evidence for the biological relevance of the classical PEPCK sub-type (Figures 4-6,  
207 Supplemental Figure 2). These data contrast with proposals that PEPCK cannot function on its  
208 own but rather is always ancillary to one of the other two C<sub>4</sub> acid decarboxylases (Furbank, 2011;  
209 Bräutigam et al., 2014; Wang et al., 2014). While this notion may be true in some cases, the  
210 current results suggest that it is not the case for *U. fusca*. Furthermore, our findings are supported  
211 by earlier measurements of enzyme activity made within the sub-tribe Melinidinae, where PEPCK

212 was also shown to be highly dominant over the other sub-types (Gutierrez et al., 1974;  
213 Prendergast et al., 1987; Lin et al., 1993), and also indicate that these differences in activity are  
214 due to differences in steady-state transcript abundance rather than post-transcriptional  
215 modifications that act to suppress accumulation of NADP-ME and NAD-ME.

216

#### 217 **C<sub>4</sub> Sub-Type Mixing**

218 Of the four C<sub>4</sub> species examined, *P. hallii* and *D. californica* show the most evidence of sub-  
219 type mixing. The potential for mixing has previously been considered in *Panicum virgatum*, a  
220 close relative of *P. hallii* (Zhang et al., 2013; Meyer et al., 2014; Rao and Dixon, 2016; Rao et al.,  
221 2016). Rao et al. (2016) suggested that the high abundance of *NADP-ME* transcripts may be  
222 accounted for by post-transcriptional or translational modifications but experimental evidence  
223 for testing that hypothesis is lacking.

224 *Digitaria californica* also showed some evidence of sub-type mixing. In this case, *NADP-ME*  
225 and *PEPCK* transcripts were both reasonably abundant. Although this species is classically  
226 considered to belong to the NADP-ME sub-type, transcripts encoding *PEPCK* were more than  
227 double the abundance of those of *NADP-ME*. *ASP-AT* transcript levels, which are also associated  
228 with the *PEPCK* sub-type, were high as well. However, enzyme activity data does not support this  
229 idea with NADP-ME having much higher levels than PEPCK. Some of these differences between  
230 transcript and enzyme levels could be due the enzyme activity assays being carried out on  
231 samples from a different growth chamber with somewhat different conditions than the RNA  
232 sequencing samples (See Materials and Methods).

233

## 234 ***Sacciolepis indica* and the C<sub>3</sub> Bundle Sheath**

235 Analysis of transcript abundance in M and BS cells from C<sub>3</sub> species that are closely related to  
236 C<sub>4</sub> species is critical to understanding how C<sub>4</sub> photosynthesis evolved and how it can be  
237 engineered for enhanced crop production. Although transcripts loaded onto ribosomes in the BS  
238 of C<sub>3</sub> *Arabidopsis thaliana* have been assessed, and this analysis provided insight into the role of  
239 the BS in eudicot plants (Aubry et al., 2014), to our knowledge, there are no equivalent data from  
240 a monocotyledonous lineage in which both C<sub>3</sub> and C<sub>4</sub> species are found. The ability to  
241 mechanically isolate intact BS cells indicates that *S. indica* has very strong BS cell walls, similar to  
242 those found in C<sub>4</sub> species. However, all other currently available data including phylogenetic  
243 placement and RNA-seq from this study are consistent with *S. indica* being a C<sub>3</sub> species. The  
244 relatively high levels of C<sub>4</sub> related transcripts in the BS of *S. indica* are consistent with previous  
245 work on cells around the veins of C<sub>3</sub> plants (Hibberd and Quick, 2002; Brown et al., 2010; Shen et  
246 al., 2016). Together, these data support the concept that some C<sub>3</sub> species are pre-adapted to  
247 adopt the C<sub>4</sub> mechanism (Gould, 1989; Christin et al., 2009; Brown et al., 2011; Christin et al.,  
248 2015; Washburn et al., 2016; Williams et al., 2016; Reyna-Llorens et al., 2018; Burgess et al.,  
249 2019). Another interesting hypothesis from this study is that perhaps *S. indica* represents a step  
250 on the pathway to becoming a C<sub>3</sub>-C<sub>4</sub> intermediate, or maybe it represents a reversion to C<sub>3</sub>  
251 photosynthesis from an ancestral C<sub>3</sub>-C<sub>4</sub> intermediate (Sage, 2004; Bräutigam and Gowik, 2016).

252

## 253 **The *S. indica* C<sub>3</sub> BS shows marked similarities and differences to the BS in other species**

254 Aubry and colleagues (2014) investigated the functions of *Arabidopsis thaliana* BS cells by  
255 labeling ribosomes within the cell type and sequencing the mRNA resident in the ribosomes. In

256 general, our *S. indica* BS cells displayed similar patterns to those seen in Arabidopsis. Of the 912  
257 significantly over-abundant gene models in the *S. indica* BS, 50 of them have Arabidopsis  
258 homologs that were significantly over-abundant in BS cells within the Aubry study (Aubry et al.,  
259 2014). These genes have annotated functions relating to transport (nucleotide, peptide, amino  
260 acid, sulphate, metals, ABS transporters), metal handling, transcription regulation, protein  
261 degradation, cell wall modification, amino acid metabolism, hormone metabolism, and ATP  
262 synthesis. Other functional annotations present both in the Arabidopsis and *S. indica* upregulated  
263 BS gene sets (but not necessarily from homologous genes) included: nitrogen metabolism,  
264 glutamine synthetase, tryptophan, ethylene induced signaling and regulation, lipid metabolism,  
265 trehalose metabolism, phenylpropanoid metabolism, and sulfur regulation (Supplemental Table  
266 1).

267 Similarly to Arabidopsis and maize, several trehalose metabolism genes were found to be  
268 overexpressed within the *S. indica* BS, supporting the hypothesis that metabolism of trehalose is  
269 an ancestral BS function (Chang et al., 2012; Aubry et al., 2014). The data are also consistent with  
270 the hypothesis that BS cells play an important role in sulfur transport and metabolism and in  
271 nitrogen metabolism (Aubry et al., 2014). We do note, however, that some sulfur metabolism  
272 related genes shown to be enriched in Arabidopsis BS were actually found to be depleted in the  
273 *S. indica* BS. Overall, the *S. indica* BS samples are highly consistent with previous studies on  
274 Arabidopsis and rice BS, indicating both the validity of the mechanical C<sub>3</sub> BS isolation done here,  
275 and the conservation of C<sub>3</sub> functions across these divergent species (Aubry et al., 2014; Hua et  
276 al., 2021).

277

## 278 **The Evolution of Three C<sub>4</sub> Sub-types in the MPC(A)**

279 For the majority of C<sub>4</sub> genes examined, all five species appear to use orthologous genes, or at  
280 least their transcripts mapped to the same *S. bicolor* gene (Figures 4 and 7). This is based on  
281 the common assumption that the highest expressed gene in each species/tissue is the one  
282 being used. For CA, PEPC, PPDK, PPT, NHD, ALA-AT, NAD-MDH, PEPCK, and NAD-ME the highest  
283 expressed gene in all species was clearly the same, although in some species the gene  
284 expression was so low it is likely non-functional. NADP-MDH, NADP-ME, and ASP-AT are less  
285 clear with the highest gene being different between some species but also often having high  
286 abundance levels for both genes making it hard to conclude that the lower gene is not relevant.  
287 The lack of good genomic resources for all species involved makes it difficult to conclude if the  
288 same genes are in fact being used by all species, and therefore potentially the result of a single  
289 recruitment, or if the genes are simply close homologs and recruited to C<sub>4</sub> separately in  
290 different lineages.

291 Ancestral state reconstructions were also performed based on the transcript abundance and  
292 enzyme activity data, however, these analyses were inconclusive and have been excluded due  
293 to the low phylogenetic sampling of the clade within this study.

294

## 295 **Materials and Methods**

### 296 **Plant Materials**

297 Accessions from five plant species were used in this study: *Setaria italica* yugu1, *Urochloa*  
298 *fusca* LBJWC-52, *Panicum hallii* FIL2, *Digitaria californica* PI 364670, and *Sacciolepis indica* PI  
299 338609. More details on the accessions can be found in Washburn et al. (2015) with exception

300 of *P. hallii* FIL2, obtained from Thomas Juenger of the University of Texas at Austin with further  
301 details at *Panicum hallii* v2.0, DOE-JGI, <http://phytozome.jgi.doe.gov/>.

302 Plant materials for RNA sequencing were grown in controlled growth chambers at the  
303 University of Missouri in Columbia. Plants were grown under 16 hours of light (from 6:00-20:00)  
304 and 8 hours of darkness with temperatures of 23C during the day and 20C at night. Lights were  
305 placed between 86-88 cm above the plants. Plantings were grown in 4 replicates in a completely  
306 randomized design with 32 plants per replicate (except for *Sacciolepis indica* where plants were  
307 smaller and grown with 64 plants per replicate). The third leaf was sampled between 11:00 and  
308 15:00 using established leaf rolling and mechanical BS isolation methods with some modifications  
309 (See Supplemental Protocol 1) (Sheen and Bogorad, 1985; Chang et al., 2012; Covshoff et al.,  
310 2013; John et al., 2014). Due to time and cost constraints only 3 of the 4 replicates (each based  
311 on a pool of plants) were processed for sequencing.

312 The protocol used for obtaining BS strands in *S. indica* was the same as that used for the C<sub>4</sub>  
313 species. Variations on the amount of time for each blending step were investigated, but only  
314 resulted in higher levels of contamination as viewed under a microscope. That said, even when  
315 microscopic examination indicated higher contamination levels in some *S. indica* BS samples,  
316 transcript abundance levels were qualitatively similar to samples with less apparent  
317 contamination. One step that may have been key to the isolation of C<sub>3</sub> BS strands, was the use of  
318 leaf rolling on the sampled leaves just prior to the BS strand isolation procedure (Furbank et al.,  
319 1985; John et al., 2014). This enables the removal of at least some M sap prior to BS isolation.

320 M enriched samples were not successfully obtained for *S. indica* in this study because of the  
321 sensitivity of the C<sub>3</sub> leaves to rolling. Very small amounts of leaf rolling pressure resulted in the



322 leaves becoming damaged to the point that the purity of M sap obtained from them was called  
323 into question. Leaves that were rolled gently enough not to damage the BS strands and  
324 contaminate the M sap resulted in sap with insufficient quantities of RNA for sequencing. It is our  
325 opinion that M sap could be sampled using: 1) low input mRNA extraction and sequencing  
326 procedures, 2) a more precise instrument for leaf rolling such as that described by Leegood  
327 (1985), and/or 3) further experimentation with the developmental stage at which M sap is  
328 extracted.

329 This resulted in 3 replicates of BS and M (or whole leaf tissue for the C<sub>3</sub>) for each of the 5  
330 species used for a total of 30 samples used in RNA extraction, sequencing, and analysis.

331

### 332 **Sequencing**

333 RNA was extracted using the PureLink® RNA Mini Kit (Invitrogen, Carlsbad, CA, USA) and  
334 mRNA-seq libraries were constructed and sequenced by the University of Missouri DNA Core  
335 Facility using the TruSeq Stranded mRNA Sample Prep Kit (Illumina, Inc., San Diego, CA, USA) and  
336 the Illumina HiSeq and NextSeq platforms.

337

### 338 **Analysis**

339 Each mRNA sample was quality trimmed and mapped to the *Sorghum bicolor* genome version  
340 3.1.1 (Paterson et al., 2009; DOE-JGI, 2017). All species were mapped to *S. bicolor* because  
341 reference genomes do not exist for some of the species in this study and the reference genomes  
342 that do exist are of variable quality leading to bias. Mapping all species to *S. bicolor*, which is  
343 equally related to all, also allows for orthology assignment during the mapping step as opposed

344 to later in the process. Raw sequence was processed using Trimmomatic and Trinity v2.8.4  
345 following the workflows outlined on the Trinity website (Grabherr et al., 2011; Haas et al., 2013;  
346 Bolger et al., 2014). This processing included the use of eXpress and Bowtie2 for read mapping  
347 and counting as well as edgeR and DESeq2 for differential expression analysis (Robinson et al.,  
348 2010; Li and Dewey, 2011; Langmead and Salzberg, 2012; McCarthy et al., 2012; Love et al., 2014).  
349 A list of known C<sub>4</sub> photosynthesis genes was compiled based on the literature; a custom script  
350 and BLAST were then used to find the appropriate homologous genes and to compare their  
351 relative abundance levels (Camacho et al., 2009; Chang et al., 2012; Covshoff et al., 2013;  
352 Bräutigam et al., 2014; John et al., 2014; Tausta et al., 2014; Rao et al., 2016). For comparisons  
353 across all cell types and species within this study, the Trimmed Mean of M-values (TMM) method  
354 described by Robinson and Oshlack (2010) as implemented in DESeq2 was used. All scripts and  
355 workflows used in the analysis can be found in a Bitbucket repository at  
356 [https://bitbucket.org/washjake/paniceae\\_c4\\_m\\_bs\\_mrna/](https://bitbucket.org/washjake/paniceae_c4_m_bs_mrna/).

357

### 358 **Enzyme assays**

359 Enzyme activity assays were performed based on methods described in (Ashton et al., 1990;  
360 Marshall et al., 2007). Samples were grown in growth chambers at the University of Cambridge,  
361 UK and growth conditions were matched as closely as possible to those above. The temperature  
362 was a constant 20C, 60% humidity, 300  $\mu$ mol light, and 16 hours of light. Samples were prepared  
363 by grinding leaf tissue with a pestle and mortar in extraction buffer then centrifuged at 13000 x  
364 g and supernatant taken.

365 For PEPCK assays, we used the Walker and Leegood method that was developed to reduce  
366 proteolysis, and which has been used extensively (Walker et al., 1995; Häusler et al., 2001;  
367 Marshall et al., 2007; Sommer et al., 2012; Sharwood et al., 2016). As it has been previously  
368 reported that the forward (de-carboxylation) reaction is about 2.6 times faster than the reverse  
369 (carboxylation) reaction, the PEPCK activity *in vivo* may be higher than what we measured  
370 (Ashton et al., 1990). PEPCK extraction buffer consisted of 200 mM Bicine-KOH, pH 9.0, 20 mM  
371 MgCl<sub>2</sub> and 5 mM DTT. NAD-ME extraction buffer consisted of 50 mM HEPES-NaOH pH 7.2, 50  
372 mM Tricine, 2 mM MnCl<sub>2</sub>, 5 mM DTT, 0.25% w/v PVP- 40000 and 0.5% Triton X-100. NADP-ME  
373 extraction buffer consisted of 50 mM HEPES-KOH pH 8.3, 50 mM Tricine, 5 mM DTT and 0.1 mM  
374 EDTA.

375 For PEPCK activity, assay buffer contained of 80 mM MES-NaOH pH 6.7, 0.35 mM NADH, 5 mM  
376 DTT, 2 mM MnCl<sub>2</sub>, 2 mM ADP and 50 mM KHCO<sub>3</sub>. Background rates were measured for five  
377 minutes then 1.2 units of malate dehydrogenase was added and rates measured for a further five  
378 minutes. Assays were initiated with the addition of 2mM Phosphoenolpyruvate (PEP). For NAD-  
379 ME activity, assay buffer contained 25 mM HEPES-NaOH pH 7.2, 5 mM L-malic acid, 2 mM NAD,  
380 5 mM DTT, 0.2 mM EDTA. Background rates were measured for five minutes then 24 mM MnCl<sub>2</sub>  
381 and 0.1 mM coenzyme A were used to initiate the reaction. For NADP-ME activity, assay buffer  
382 contained 25 mM Tricine-KOH pH 8.3, 5 mM L-malic acid, 0.5 mM NADP, 0.1 mM EDTA.  
383 Background rates were measured for five minutes, and the assays were initiated with 2mM  
384 MgCl<sub>2</sub>.

385 All assays were performed in 96 well plates at 25°C in a CLARIOstar plus plate-reader (BMG  
386 labtech) in 200 µl reactions with absorbance at 340 nm measured every 60 s until steady states

387 were reached. Rates were calculated as the rate of reaction from the initial slope of the reaction  
388 minus any observed background rate. Rates were normalized to both protein concentration,  
389 measured using the Qubit protein assay (Life Technologies), and chlorophyll concentration,  
390 extracted using 80% acetone and calculated as in Porra et al. (1989).

391

### 392 **RNA *in situ* hybridization**

393 Each of the genotypes were grown in a climate-controlled growth chamber at 50% relative  
394 humidity in 16:8 light to dark cycles at 29.4° C and 23.9° C day and night temperature,  
395 respectively. These conditions were different from the original mRNA samples due to the  
396 logistics of growth chamber availability. However, since the results appear to support those  
397 from the RNAseq at a lower temperature it does not appear this temperature difference had a  
398 strong impact. Replicates of fully expanded leaf three were harvested from each genotype  
399 when plants were at vegetative stage 4 (V4) when the fourth leaf collar was visible. Along the  
400 longitudinal length of the leaf blade, mid-sections of blade tissue were dissected in 3.7% FAA at  
401 4° C. Samples were vacuum infiltrated and fixed overnight at 4° C in 3.7% FAA. Leaf samples  
402 were dehydrated through a graded ethanol series (50%, 70%, 85%, 95%, 100%) with 3 changes  
403 in 100% ethanol; all changes were 1 hour each at 4° C except for the last 100% ethanol, which  
404 was overnight at 4° C. Samples were then passed through a graded HistoChoice® (Sigma-  
405 Aldrich) series (3:1, 1:1, 1:3 ethanol: HistoChoice®) with 3 changes in 100% HistoChoice®; all  
406 changes were 1 hour each at room temperature. Samples were then embedded in  
407 Paraplast®Plus (McCormick Scientific), sectioned to 10 µm, and hybridized as described  
408 previously (Strable and Satterlee, 2021). Two fragments for *PEPCK* consisted of 450 base pairs

409 (bp) of the CDS (synthesized from JSC4-6 and JSC4-7 primers) and 456 bp of the 3' end that  
410 included UTR (JSC4-4 and JSC4-5). Two fragments for *NADP-ME* consisted of 790 base pairs (bp)  
411 of the CDS (JSC4-8 and JSC4-9) and 286 bp of the 3' end that included UTR (JSC4-10 and JSC4-  
412 11). Fragments were subcloned into pCR 4-TOPO (Invitrogen) and confirmed by Sanger  
413 sequencing. Antisense or sense strand digoxigenin-UTP labeled RNA was generated for *PEPCK*  
414 and *NADP-ME* using a DIG RNA labeling kit (Roche). For *PEPCK* hybridizations, equal amounts of  
415 the two probes for *PEPCK* were mixed prior to hybridization. Similarly, for *NADP-ME*  
416 hybridizations, equal amounts of the two probes for *NADP-ME* were mixed prior to  
417 hybridization. Primer sequences for RNA in situ probes are provided in Supplemental Table 3.

418

419

#### 420 **Accession numbers**

421 Sequence data are available on NCBI SRA (<https://www.ncbi.nlm.nih.gov/sra>) under accession  
422 number ....

423

#### 424 **Supplemental data files**

425 Supplemental Table 1. Differentially expressed genes between the whole leaf and bundle  
426 sheath of *Sacciolepis indica*.

427 Supplemental Table 2. Differentially expressed genes that are upregulated in all four C4  
428 species bundle sheath cells and down regulated in *Sacciolepis indica* bundle sheath.

429

430

431

432 **Author Contributions**

433 All Authors contributed to drafting and revising the manuscript. JDW, JCP, GCC, SC, and JMH  
434 conceived of the work and experimental design. JDW, SC, SSK, and JMB developed and performed  
435 the leaf rolling experiments. JDW performed the bioinformatic analysis. JS performed the RNA *in*  
436 *situ* hybridization experiments. PD and JMH designed and performed the enzyme assay  
437 experiments. JDW has agreed to serve as the author responsible for contact and communication.

438

439 **Acknowledgments**

440 This work was supported by grants from the University of Missouri (Mizzou Advantage, MU  
441 Research Board, and Molecular Life Science Fellowships), and the U.S. National Science  
442 Foundation (Award no. 1501406, 1710618, 1710973). Additional support comes from the U.S.  
443 Department of Agriculture, Agricultural Research Service.

444

445 **Conflict of Interest Statement**

446 The authors declare no conflicts of interest.

447

448

## 449 **Figure Legends**

450

### 451 **Figure 1. Phylogenetic relationships between a subset of species in the grass tribe Paniceae** 452 **(Poaceae).**

453 The photosynthetic type (C<sub>3</sub> or C<sub>4</sub>) and C<sub>4</sub> sub-type of each species is labeled in the colored  
454 triangle next to it. *NADP-ME* = *NADP-DEPENDENT MALIC ENZYME*, *PCK* =  
455 *PHOSPHONENOLPYRUVATE CARBOXYKINASE*, *NAD-ME* = *NAD-DEPENDENT MALIC ENZYME*. A)  
456 Phylogeny based on nuclear genes (Vicentini et al. 2008 and Washburn et al. 2017). B)  
457 Phylogeny based on chloroplast genes (Washburn et al. 2015).

458

### 459 **Figure 2. Representative whole leaf and bundle strands.**

460 Images from leaves that have been rolled to remove mesophyll (M) contents or bundle sheath  
461 (BS) strands after isolation. A) *Setaria italica*, B) *Urochloa fusca*, C) *Panicum hallii*, D) *Digitaria*  
462 *californica*, E) *Sacciolepis indica*. All species use the C<sub>4</sub> pathway except E, *Sacciolepis indica*  
463 which is a C<sub>3</sub> plant. The bands of cells with low chlorophyll content in M images represent the  
464 position of mesophyll cells that have collapsed and had their contents expelled during the  
465 rolling procedure. Scale bars are depicted.

466

### 467 **Figure 3. Log<sub>2</sub> fold change between mesophyll (M) and bundle sheath (BS) enriched mRNA** 468 **transcripts.**

469 Species used are *Setaria italica*, *Urochloa fusca*, *Panicum hallii* and *Digitaria californica*, and  
470 *Sacciolepis indica*. Note that for *S. indica*, a C<sub>3</sub> species, whole leaf data is used in place of M.  
471 Genes depicted encode proteins of the core C<sub>4</sub> cycle that are known to be preferentially  
472 expressed in either: A) M, or B) BS cells. The number of asterisks in each box represents the p-  
473 value. \*\*\* p < 0.001, \*\* p < 0.01, \* p < 0.05. *CA* = *CARBONIC ANHYDRASE*, *PEPC* =  
474 *PHOSPHOENOLPYRUVATE CARBOXYLASE*, *NADP-MDH* = *NADP-DEPENDENT MALATE*  
475 *DEHYDROGENASE*, *PPDK* = *PYRUVATE, ORTHOPHOSPHATE DIKINASE*, *NADP-ME* = *NADP-*  
476 *DEPENDENT MALIC ENZYME*, *PEPCK* = *PHOSPHONENOLPYRUVATE CARBOXYKINASE*, *NAD-ME* =  
477 *NAD-DEPENDENT MALIC ENZYME*, *NAD-MDH* = *NADP-DEPENDENT MALATE DEHYDROGENASE*,  
478 *RCA* = *RUBISCO ACTIVASE*, *RBCS* = *RUBISCO SMALL SUBUNIT*, *ASP-AT* = *ASPARAGINE-*  
479 *AMINOTRANSFERASE*, and *ALA-AT* = *ALANINE-AMINO TRANSFERASE*. *DIT* = *DICARBOXYLATE*  
480 *TRANSPORTER 1*, *BASS2* = *SODIUM BILE ACID SYMPORTER 2*, *NHD* = *SODIUM:HYDROGEN*  
481 *ANTIORTER*, *DIC* = *MITOCHONDRIAL DICARBOXYLATE CARRIER*, *PPT* =  
482 *PHOSPHATE/PHOSPHOENOLPYRUVATE TRANSLOCATOR*. The addition of a space and a number  
483 after the enzyme name indicates that multiple genes were mapped that may perform this  
484 function.

485

### 486 **Figure 4. Relative transcript abundance between core C<sub>4</sub> enzymes within mesophyll (M) and** 487 **bundle sheath (BS) extracts.** Data is displayed for: A) *Setaria italica*, B) *Urochloa fusca*, C) 488 *Panicum hallii*, and D) *Digitaria californica*. The schematics below each histogram indicate the 489 enzyme complement associated with each of the three biochemical sub-types. *CA* = *CARBONIC* 490 *ANHYDRASE*, *PEPC* = *PHOSPHOENOLPYRUVATE CARBOXYLASE*, *NADP-MDH* = *NADP-DEPENDENT* 491 *MALATE DEHYDROGENASE*, *PPDK* = *PYRUVATE, ORTHOPHOSPHATE DIKINASE*, *NADP-ME* = 492 *NADP-DEPENDENT MALIC ENZYME*, *PEPCK* = *PHOSPHONENOLPYRUVATE CARBOXYKINASE*, *NAD-*

493 *ME = NAD-DEPENDENT MALIC ENZYME, NAD-MDH = NADP-DEPENDENT MALATE*  
494 *DEHYDROGENASE, RCA = RUBISCO ACTIVASE, RBCS = RUBISCO SMALL SUBUNIT, ASP-AT =*  
495 *ASPARAGINE-AMINOTRANSFERASE, and ALA-AT = ALANINE-AMINO TRANSFERASE. DIT =*  
496 *DICARBOXYLATE TRANSPORTER 1 , BASS2 = SODIUM BILE ACID SYMPORTER 2, NHD =*  
497 *SODIUM:HYDROGEN ANTIPTORTER, DIC = MITOCHONDRIAL DICARBOXYLATE CARRIER, PPT =*  
498 *PHOSPHATE/PHOSPHOENOLPYRUVATE TRANSLOCATOR. The addition of a space and a number*  
499 *after the enzyme name indicates that multiple genes where mapped that may perform this*  
500 *function. Error bars are plus or minus the standard error across replicates.*

501

502 **Figure 5. Enzyme activities of C<sub>4</sub> decarboxylases.** *NADP-DEPENDENT MALIC ENZYME (NADP-*  
503 *ME), PHOSPHOENOLPYRUVATE CARBOXYKINASE (PEPCK), and NAD-DEPENDENT MALIC ENZYME*  
504 *(NAD-ME) for *Setaria italica*, *Urochloa fusca*, *Panicum hallii*, and *Digitaria californica*. Error bars*  
505 *represent plus or minus the standard error across replicates.*

506

507 **Figure 6. Relative transcript accumulation and enzyme activities of C<sub>4</sub> decarboxylases.** *NADP-*  
508 *DEPENDENT MALIC ENZYME (NADP-ME), PHOSPHOENOLPYRUVATE CARBOXYKINASE (PEPCK),*  
509 *and NAD-DEPENDENT MALIC ENZYME (NAD-ME) transcript accumulation and enzyme activities*  
510 *for *Setaria italica*, *Urochloa fusca*, *Panicum hallii*, and *Digitaria californica*. Values are*  
511 *represented as a percentage of the total of all three decarboxylase values. Enzyme and mRNA*  
512 *data were not collected at the same time, but under closely matching environmental*  
513 *conditions.*

514

515 **Figure 7. Relative transcript abundance between core C<sub>4</sub> enzymes within whole leaf and**  
516 **bundle sheath (BS) extracts from *Saccioilipis indica*.** A) Whole leaf, B) Bundle sheath. *CA =*  
517 *CARBONIC ANHYDRASE, PEPC = PHOSPHOENOLPYRUVATE CARBOXYLASE, NADP-MDH = NADP-*  
518 *DEPENDENT MALATE DEHYDROGENASE, PPK = PYRUVATE, ORTHOPHOSPHATE DIKINASE,*  
519 *NADP-ME = NADP-DEPENDENT MALIC ENZYME, PEPCK = PHOSPHONENOLPYRUVATE*  
520 *CARBOXYKINASE, NAD-ME = NAD-DEPENDENT MALIC ENZYME, NAD-MDH = NADP-DEPENDENT*  
521 *MALATE DEHYDROGENASE, RCA = RUBISCO ACTIVASE, RBCS = RUBISCO SMALL SUBUNIT, ASP-*  
522 *AT = ASPARAGINE-AMINOTRANSFERASE, and ALA-AT = ALANINE-AMINO TRANSFERASE. DIT =*  
523 *DICARBOXYLATE TRANSPORTER 1 , BASS2 = SODIUM BILE ACID SYMPORTER 2, NHD =*  
524 *SODIUM:HYDROGEN ANTIPTORTER, DIC = MITOCHONDRIAL DICARBOXYLATE CARRIER, PPT =*  
525 *PHOSPHATE/PHOSPHOENOLPYRUVATE TRANSLOCATOR. The addition of a space and a number*  
526 *after the enzyme name indicates that multiple genes where mapped that may perform this*  
527 *function. Error bars are plus or minus the standard error across replicates.*



528 **Literature Cited**

529 **Arp JJ, Kambhampati S, Chu KL, Koley S, Jenkins LM, Mockler TC, Allen DK (2021)**

530 Developmental Effects on Relative Use of PEPCK and NADP-ME Pathways of C<sub>4</sub>

531 Photosynthesis in Maize. 2021.2006.2025.449949

532 **Ashton AR, Burnell JN, Furbank RT, Jenkins CLD, Hatch MD (1990)** The enzymes in C<sub>4</sub>

533 photosynthesis. *In* PJ Lea, JB Harborne, eds, *Enzymes of Primary Metabolism*, Vol 3.

534 Academic Press, London, UK, pp 39-72

535 **Aubry S, Smith-Unna RD, Bournnell CM, Kopriva S, Hibberd JM (2014)** Transcript residency on

536 ribosomes reveals a key role for the Arabidopsis thaliana bundle sheath in sulfur and

537 glucosinolate metabolism. *The Plant Journal* **78**: 659-673

538 **Bellasio C, Griffiths H (2013)** The operation of two decarboxylases (NADPME and PEPCK),

539 transamination and partitioning of C<sub>4</sub> metabolic processes between mesophyll and

540 bundle sheath cells allows light capture to be balanced for the maize C<sub>4</sub> pathway. *Plant*

541 *Physiology*

542 **Blätke MA, Bräutigam A (2019)** Evolution of C<sub>4</sub> photosynthesis predicted by constraint-based

543 modelling. *Elife* **8**

544 **Bolger AM, Lohse M, Usadel B (2014)** Trimmomatic: a flexible trimmer for Illumina sequence

545 data. *Bioinformatics* **30**

546 **Bräutigam A, Gowik U (2016)** Photorespiration connects C<sub>3</sub> and C<sub>4</sub> photosynthesis. *Journal of*

547 *Experimental Botany* **67**: 2953-2962

548 **Bräutigam A, Schliesky S, Külahoglu C, Osborne CP, Weber APM (2014)** Towards an integrative

549 model of C<sub>4</sub> photosynthetic subtypes: insights from comparative transcriptome analysis

550 of NAD-ME, NADP-ME, and PEP-CK C<sub>4</sub> species. *Journal of Experimental Botany* **65**: 3579-  
551 3593

552 **Brown NJ, Newell CA, Stanley S, Chen JE, Perrin AJ, Kajala K, Hibberd JM** (2011) Independent  
553 and Parallel Recruitment of Preexisting Mechanisms Underlying C<sub>4</sub> Photosynthesis.  
554 *Science* **331**: 1436-1439

555 **Brown NJ, Palmer BG, Stanley S, Hajaji H, Janacek SH, Astley HM, Parsley K, Kajala K, Quick**  
556 **WP, Trenkamp S, Fernie AR, Maurino VG, Hibberd JM** (2010) C<sub>4</sub> acid decarboxylases  
557 required for C<sub>4</sub> photosynthesis are active in the mid-vein of the C<sub>3</sub> species *Arabidopsis*  
558 *thaliana*, and are important in sugar and amino acid metabolism. *The Plant Journal* **61**:  
559 122-133

560 **Brown WV** (1977) The Kranz syndrome and its subtypes in grass systematics. *Memoirs of the*  
561 *Torrey Botanical Club* **23**: 1-97

562 **Burgess SJ, Reyna-Llorens I, Stevenson SR, Singh P, Jaeger K, Hibberd JM** (2019) Genome-Wide  
563 Transcription Factor Binding in Leaves from C<sub>3</sub> and C<sub>4</sub> Grasses. *PNAS* **31**: 2297-2314

564 **Cacefo V, Ribas AF, Zilliani RR, Neris DM, Domingues DS, Moro AL, Vieira LGE** (2019)  
565 Decarboxylation mechanisms of C<sub>4</sub> photosynthesis in *Saccharum* spp.: increased PEPCK  
566 activity under water-limiting conditions. *BMC Plant Biology* **19**: 144

567 **Camacho C, Coulouris G, Avagyan V, Ma N, Papadopoulos J, Bealer K, Madden T** (2009)  
568 BLAST+: architecture and applications. *BMC Bioinformatics* **10**: 421

569 **Chang YM, Liu WY, Shih AC, Shen MN, Lu CH, Lu MY, Yang HW, Wang TY, Chen SC, Chen SM, Li**  
570 **WH, Ku MS** (2012) Characterizing regulatory and functional differentiation between

- 571 maize mesophyll and bundle sheath cells by transcriptomic analysis. *Plant Physiol* **160**:  
572 165-177
- 573 **Christin P-A, Samaritani E, Petitpierre B, Salamin N, Besnard G** (2009) Evolutionary insights on  
574 C<sub>4</sub> photosynthetic subtypes in grasses from genomics and phylogenetics. *Genome*  
575 *Biology and Evolution* **1**: 221-230
- 576 **Christin PA, Arakaki M, Osborne CP, Edwards EJ** (2015) Genetic enablers underlying the  
577 clustered evolutionary origins of C<sub>4</sub> photosynthesis in angiosperms. *Molecular Biology*  
578 *and Evolution* **32**: 846-858
- 579 **Covshoff S, Furbank RT, Leegood RC, Hibberd JM** (2013) Leaf rolling allows quantification of  
580 mRNA abundance in mesophyll cells of sorghum. *Journal of Experimental Botany* **64**:  
581 807-813
- 582 **DOE-JGI** (2017) *Sorghum bicolor* v3.1. *In*,
- 583 **Edwards GE, Kanai R, Black CC** (1971) Phosphoenolpyruvate carboxykinase in leaves of certain  
584 plants which fix CO<sub>2</sub> by the C<sub>4</sub>-dicarboxylic acid cycle of photosynthesis. *Biochemical*  
585 *and Biophysical Research Communications* **45**: 278-285
- 586 **Furbank RT** (2011) Evolution of the C<sub>4</sub> photosynthetic mechanism: are there really three C<sub>4</sub> acid  
587 decarboxylation types? *Journal of Experimental Botany* **62**: 3103-3108
- 588 **Furbank RT** (2016) Walking the C<sub>4</sub> pathway: past, present, and future. *Journal of Experimental*  
589 *Botany* **67**: 4057-4066
- 590 **Furbank RT, Stitt M, Foyer CH** (1985) Intercellular compartmentation of sucrose synthesis in  
591 leaves of *Zea mays* L. *Planta* **164**: 172-178

- 592 **Gould SJ** (1989) *Wonderful life: the Burgess Shale and the nature of history*, Ed 1st. W.W.  
593 Norton, New York
- 594 **Grabherr MG, Haas BJ, Yassour M, Levin JZ, Thompson DA, Amit I, Adiconis X, Fan L,**  
595 **Raychowdhury R, Zeng Q, Chen Z, Mauceli E, Hacohen N, Gnirke A, Rhind N, di Palma**  
596 **F, Birren BW, Nusbaum C, Lindblad-Toh K, Friedman N, Regev A** (2011) Full-length  
597 transcriptome assembly from RNA-Seq data without a reference genome. *Nat*  
598 *Biotechnol* **29**: 644-652
- 599 **Grass Phylogeny Working Group II** (2012) New grass phylogeny resolves deep evolutionary  
600 relationships and discovers C<sub>4</sub> origins. *New Phytologist* **193**: 304-312
- 601 **Gutierrez M, Gracén VE, Edwards GE** (1974) Biochemical and cytological relationships in C<sub>4</sub>  
602 plants. *Planta* **119**: 279-300
- 603 **Haas BJ, Papanicolaou A, Yassour M, Grabherr M, Blood PD, Bowden J, Couger MB, Eccles D,**  
604 **Li B, Lieber M, MacManes MD, Ott M, Orvis J, Pochet N, Strozzi F, Weeks N,**  
605 **Westerman R, William T, Dewey CN, Henschel R, LeDuc RD, Friedman N, Regev A**  
606 (2013) De novo transcript sequence reconstruction from RNA-seq using the Trinity  
607 platform for reference generation and analysis. *Nat. Protocols* **8**: 1494-1512
- 608 **Hatch M, Kagawa T, Craig S** (1975) Subdivision of C<sub>4</sub>-Pathway Species Based on Differing C<sub>4</sub> Acid  
609 Decarboxylating Systems and Ultrastructural Features. *Functional Plant Biology* **2**: 111-  
610 128
- 611 **Hatch M, Slack C** (1966) Photosynthesis by sugar-cane leaves. A new carboxylation reaction and  
612 the pathway of sugar formation. *Biochemical Journal* **101**: 103-111

- 613 **Hatch MD** (1987) C<sub>4</sub> photosynthesis: a unique blend of modified biochemistry, anatomy and  
614 ultrastructure. *Biochimica et Biophysica Acta (BBA) - Reviews on Bioenergetics* **895**: 81-  
615 106
- 616 **Hatch MD** (1992) I can't believe my luck. *Photosynthesis Research* **33**: 1-14
- 617 **Hatch MD, Kagawa T** (1974) Activity, location and role of NAD malic enzyme in leaves with C<sub>4</sub>-  
618 pathway photosynthesis. *Austral. J. Pl. Physiol* **1**: 357-369
- 619 **Hatch MD, Kagawa T** (1976) Photosynthetic activities of isolated bundle sheath cells in relation  
620 to differing mechanisms of C<sub>4</sub> pathway photosynthesis. *Archives of Biochemistry and*  
621 *Biophysics* **175**: 39-53
- 622 **Häusler RE, Rademacher T, Li J, Lipka V, Fischer KL, Schubert S, Kreuzaler F, Hirsch HJ** (2001)  
623 Single and double overexpression of C<sub>4</sub>-cycle genes had differential effects on the  
624 pattern of endogenous enzymes, attenuation of photorespiration and on contents of UV  
625 protectants in transgenic potato and tobacco plants. *Journal of Experimental Botany* **52**:  
626 1785-1803
- 627 **Heckmann D, Schulze S, Denton A, Gowik U, Westhoff P, Weber Andreas PM, Lercher Martin J**  
628 (2013) Predicting C<sub>4</sub> Photosynthesis Evolution: Modular, Individually Adaptive Steps on a  
629 Mount Fuji Fitness Landscape. *Cell* **153**: 1579-1588
- 630 **Hibberd JM, Covshoff S** (2010) The regulation of gene expression required for C<sub>4</sub>  
631 photosynthesis. *Annu Rev Plant Biol* **61**: 181-207
- 632 **Hibberd JM, Quick WP** (2002) Characteristics of C<sub>4</sub> photosynthesis in stems and petioles of C<sub>3</sub>  
633 flowering plants. *Nature* **415**: 451-454

- 634 **Hua L, Stevenson SR, Reyna-Llorens I, Xiong H, Kopriva S, Hibberd JM** (2021) The bundle  
635 sheath of rice is conditioned to play an active role in water transport as well as sulfur  
636 assimilation and jasmonic acid synthesis. 2021.2004.2016.440137
- 637 **John CR, Smith-Unna RD, Woodfield H, Covshoff S, Hibberd JM** (2014) Evolutionary  
638 Convergence of Cell-Specific Gene Expression in Independent Lineages of C<sub>4</sub> Grasses.  
639 *Plant Physiology* **165**: 62-75
- 640 **Kopriva S, Weber APM** (2021) Genetic encoding of complex traits. *J Exp Bot* **72**: 1-3
- 641 **Koteyeva NK, Voznesenskaya EV, Edwards GE** (2015) An assessment of the capacity for  
642 phosphoenolpyruvate carboxykinase to contribute to C<sub>4</sub> photosynthesis. *Plant Science*  
643 **235**: 70-80
- 644 **Langdale JA** (2011) C<sub>4</sub> cycles: past, present, and future research on C<sub>4</sub> photosynthesis. *Plant Cell*  
645 **23**: 3879-3892
- 646 **Langmead B, Salzberg SL** (2012) Fast gapped-read alignment with Bowtie 2. *Nat Methods* **9**
- 647 **Leegood RC** (1985) The intercellular compartmentation of metabolites in leaves of *Zea mays* L.  
648 *Planta* **164**: 163-171
- 649 **Li B, Dewey CN** (2011) RSEM: accurate transcript quantification from RNA-Seq data with or  
650 without a reference genome. *BMC Bioinformatics* **12**
- 651 **Lin C, Tai Y, Liu D, Ku M** (1993) Photosynthetic mechanisms of weeds in taiwan. *Functional*  
652 *Plant Biology* **20**: 757-769
- 653 **Love MI, Huber W, Anders S** (2014) Moderated estimation of fold change and dispersion for  
654 RNA-seq data with DESeq2. *Genome Biol* **15**

- 655 **Majeran W, Friso G, Ponnala L, Connolly B, Huang M, Reidel E, Zhang C, Asakura Y, Bhuiyan**  
656 **NH, Sun Q, Turgeon R, van Wijk KJ** (2010) Structural and Metabolic Transitions of C(4)  
657 Leaf Development and Differentiation Defined by Microscopy and Quantitative  
658 Proteomics in Maize. *The Plant Cell* **22**: 3509-3542
- 659 **Mallmann J, Heckmann D, Bräutigam A, Lercher MJ, Weber APM, Westhoff P, Gowik U** (2014)  
660 The role of photorespiration during the evolution of C<sub>4</sub> photosynthesis in the genus  
661 *Flaveria*. *eLife* **3**: e02478
- 662 **Marshall DM, Muhaidat R, Brown NJ, Liu Z, Stanley S, Griffiths H, Sage RF, Hibberd JM** (2007)  
663 *Cleome*, a genus closely related to *Arabidopsis*, contains species spanning a  
664 developmental progression from C<sub>3</sub> to C<sub>4</sub> photosynthesis. **51**: 886-896
- 665 **McCarthy DJ, Chen Y, Smyth GK** (2012) Differential expression analysis of multifactor RNA-Seq  
666 experiments with respect to biological variation. *Nucleic Acids Research* **40**: 4288-4297
- 667 **Meyer E, Aspinwall MJ, Lowry DB, Palacio-Mejía JD, Logan TL, Fay PA, Juenger TE** (2014)  
668 Integrating transcriptional, metabolomic, and physiological responses to drought stress  
669 and recovery in switchgrass (*Panicum virgatum* L.). *BMC Genomics* **15**: 527
- 670 **Niklaus M, Kelly S** (2019) The molecular evolution of C<sub>4</sub> photosynthesis: opportunities for  
671 understanding and improving the world's most productive plants. *J Exp Bot* **70**: 795-804
- 672 **Paterson AH, Bowers JE, Bruggmann R, Dubchak I, Grimwood J, Gundlach H, Haberer G,**  
673 **Hellsten U, Mitros T, Poliakov A, Schmutz J, Spannagl M, Tang H, Wang X, Wicker T,**  
674 **Bharti AK, Chapman J, Feltus FA, Gowik U, Grigoriev IV, Lyons E, Maher CA, Martis M,**  
675 **Narechania A, Otiillar RP, Penning BW, Salamov AA, Wang Y, Zhang L, Carpita NC,**  
676 **Freeling M, Gingle AR, Hash CT, Keller B, Klein P, Kresovich S, McCann MC, Ming R,**

- 677           **Peterson DG, Mehboob ur R, Ware D, Westhoff P, Mayer KFX, Messing J, Rokhsar DS**  
678           (2009) The Sorghum bicolor genome and the diversification of grasses. *Nature* **457**: 551-  
679           556
- 680   **Pick TR, Brautigam A, Schluter U, Denton AK, Colmsee C, Scholz U, Fahnenstich H, Pieruschka**  
681           **R, Rascher U, Sonnewald U, Weber AP** (2011) Systems analysis of a maize leaf  
682           developmental gradient redefines the current C<sub>4</sub> model and provides candidates for  
683           regulation. *Plant Cell* **23**: 4208-4220
- 684   **Pinto H, Powell JR, Sharwood RE, Tissue DT, Ghannoum O** (2016) Variations in nitrogen use  
685           efficiency reflect the biochemical subtype while variations in water use efficiency reflect  
686           the evolutionary lineage of C<sub>4</sub> grasses at inter-glacial CO<sub>2</sub>. **39**: 514-526
- 687   **Porra RJ, Thompson WA, Kriedemann PE** (1989) Determination of accurate extinction  
688           coefficients and simultaneous equations for assaying chlorophylls a and b extracted with  
689           four different solvents: verification of the concentration of chlorophyll standards by  
690           atomic absorption spectroscopy. *Biochimica et Biophysica Acta (BBA) - Bioenergetics*  
691           **975**: 384-394
- 692   **Prendergast H, Hattersley P, Stone N** (1987) New structural/biochemical associations in leaf  
693           blades of C<sub>4</sub> grasses (Poaceae). *Functional Plant Biology* **14**: 403-420
- 694   **Raghavendra AS** (1980) Characteristics of plant species intermediate between C<sub>3</sub> and C<sub>4</sub>  
695           pathways of photosynthesis: their focus of mechanism and evolution of C<sub>4</sub> syndrome.  
696           *Photosynthetica* **14**: 271-273
- 697   **Rao X, Dixon RA** (2016) The Differences between NAD-ME and NADP-ME Subtypes of C<sub>4</sub>  
698           Photosynthesis: More than Decarboxylating Enzymes. *Frontiers in Plant Science* **7**



- 699 **Rao X, Lu N, Li G, Nakashima J, Tang Y, Dixon RA** (2016) Comparative cell-specific  
700 transcriptomics reveals differentiation of C<sub>4</sub> photosynthesis pathways in switchgrass and  
701 other C<sub>4</sub> lineages. *Journal of Experimental Botany* **67**: 1649-1662
- 702 **Rawsthorne S** (1992) C<sub>3</sub>–C<sub>4</sub> intermediate photosynthesis: linking physiology to gene expression.  
703 **2**: 267-274
- 704 **Reyna-Llorens I, Burgess SJ, Reeves G, Singh P, Stevenson SR, Williams BP, Stanley S, Hibberd**  
705 **JM** (2018) Ancient duons may underpin spatial patterning of gene expression in C<sub>4</sub>  
706 leaves. *PNAS* **115**: 1931-1936
- 707 **Robinson MD, McCarthy DJ, Smyth GK** (2010) edgeR: a Bioconductor package for differential  
708 expression analysis of digital gene expression data. *Bioinformatics* **26**
- 709 **Robinson MD, Oshlack A** (2010) A scaling normalization method for differential expression  
710 analysis of RNA-seq data. *Genome Biology* **11**: R25
- 711 **Sage RF** (2001) Environmental and evolutionary preconditions for the origin and diversification  
712 of the C<sub>4</sub> photosynthetic syndrome. *Plant Biology* **3**: 202-213
- 713 **Sage RF** (2004) The evolution of C<sub>4</sub> photosynthesis. *New Phytologist* **161**: 341-370
- 714 **Sage RF, Christin PA, Edwards EJ** (2011) The C<sub>4</sub> plant lineages of planet earth. *Journal of*  
715 *Experimental Botany* **62**: 3155-3169
- 716 **Sage RF, Sage TL, Kocacinar F** (2012) Photorespiration and the evolution of C<sub>4</sub> photosynthesis.  
717 *Annual Review of Plant Biology* **63**: 19-47
- 718 **Schluter U, Weber APM** (2020) Regulation and Evolution of C<sub>4</sub> Photosynthesis. *Annu Rev Plant*  
719 *Biol* **71**: 183-215

- 720 **Sharwood R, Sonawane BV, Ghannoum O, Whitney SJJ** (2016) Improved analysis of C<sub>4</sub> and  
721 C<sub>3</sub> photosynthesis via refined in vitro assays of their carbon fixation biochemistry. **67**:  
722 3137 - 3148
- 723 **Sharwood RE, Sonawane BV, Ghannoum O** (2014) Photosynthetic flexibility in maize exposed  
724 to salinity and shade. *Journal of Experimental Botany* **65**: 3715-3724
- 725 **Sheen J-Y, Bogorad L** (1985) Differential Expression of the Ribulose Bisphosphate Carboxylase  
726 Large Subunit Gene in Bundle Sheath and Mesophyll Cells of Developing Maize Leaves Is  
727 Influenced by Light. *Plant Physiology* **79**: 1072-1076
- 728 **Sheen J** (1999) C<sub>4</sub> Gene Expression. *Annual Review of Plant Physiology & Plant Molecular*  
729 *Biology* **50**: 187
- 730 **Shen W, Ye L, Ma J, Yuan Z, Zheng B, LV C, Zhu Z, Chen X, Gao Z, Chen G** (2016) The existence  
731 of C<sub>4</sub>-bundle-sheath-like photosynthesis in the mid-vein of C<sub>4</sub> rice. *Rice* **9**: 20
- 732 **Sommer M, Brautigam A, Weber AP** (2012) The dicotyledonous NAD malic enzyme C<sub>4</sub> plant  
733 *Cleome gynandra* displays age-dependent plasticity of C<sub>4</sub> decarboxylation biochemistry.  
734 *Plant Biol (Stuttg)* **14**: 621-629
- 735 **Sonawane BV, Sharwood RE, Whitney S, Ghannoum O** (2018) Shade compromises the  
736 photosynthetic efficiency of NADP-ME less than that of PEP-CK and NAD-ME C<sub>4</sub> grasses.  
737 *Journal of Experimental Botany* **69**: 3053-3068
- 738 **Strable J, Satterlee JW** (2021) Detecting Spatiotemporal Transcript Accumulation in Maize by  
739 RNA In Situ Hybridization. *Bio-protocol* **11**: e3931

- 740 **Tausta SL, Li P, Si Y, Gandotra N, Liu P, Sun Q, Brutnell TP, Nelson T** (2014) Developmental  
741 dynamics of Kranz cell transcriptional specificity in maize leaf reveals early onset of C<sub>4</sub>-  
742 related processes. *Journal of Experimental Botany*
- 743 **Vicentini A, Barber JC, Aliscioni SS, Giussani LM, Kellogg EA** (2008) The age of the grasses and  
744 clusters of origins of C<sub>4</sub> photosynthesis. *Global Change Biology* **14**: 2963-2977
- 745 **von Caemmerer S, Ghannoum O, Furbank RT** (2017) C<sub>4</sub> photosynthesis: 50 years of discovery  
746 and innovation. *Journal of Experimental Botany* **68**: 97-102
- 747 **Walker RP, Acheson RM, Técsi LI, Leegood RC** (1997) Phosphoenolpyruvate Carboxykinase in C<sub>4</sub>  
748 Plants: Its Role and Regulation. *Functional Plant Biology* **24**: 459-468
- 749 **Walker RP, Trevanion SJ, Leegood RC** (1995) Phosphoenolpyruvate carboxykinase from higher  
750 plants: Purification from cucumber and evidence of rapid proteolytic cleavage in  
751 extracts from a range of plant tissues. *Planta* **196**: 58-63
- 752 **Wang C, Guo L, Li Y, Wang Z** (2012) Systematic Comparison of C<sub>3</sub> and C<sub>4</sub> Plants Based on  
753 Metabolic Network Analysis. *BMC Systems Biology* **6**: S9
- 754 **Wang Y, Bräutigam A, Weber APM, Zhu X-G** (2014) Three distinct biochemical subtypes of C<sub>4</sub>  
755 photosynthesis? A modelling analysis. *Journal of Experimental Botany* **65**: 3567-3578
- 756 **Washburn JD, Bird KA, Conant GC, Pires JC** (2016) Convergent Evolution and the Origin of  
757 Complex Phenotypes in the Age of Systems Biology. *International Journal of Plant*  
758 *Sciences* **177**: 305-318
- 759 **Washburn JD, Schnable JC, Conant GC, Brutnell TP, Shao Y, Zhang Y, Ludwig M, Davidse G,**  
760 **Pires JC** (2017) Genome-Guided Phylo-Transcriptomic Methods and the Nuclear  
761 Phylogentic Tree of the Paniceae Grasses. *Sci Rep* **7**: 13528

- 762 **Washburn JD, Schnable JC, Davidse G, Pires JC** (2015) Phylogeny and photosynthesis of the  
763 grass tribe Paniceae. *American Journal of Botany* **102**: 1493-1505
- 764 **Weissmann S, Ma F, Furuyama K, Gierse J, Berg H, Shao Y, Taniguchi M, Allen DK, Brutnell TP**  
765 (2016) Interactions of C<sub>4</sub> Subtype Metabolic Activities and Transport in Maize Are  
766 Revealed through the Characterization of DCT2 Mutants. *The Plant Cell* **28**: 466-484
- 767 **Williams BP, Burgess SJ, Reyna-Llorens I, Knerova J, Aubry S, Stanley S, Hibberd JM** (2016) An  
768 Untranslated cis-Element Regulates the Accumulation of Multiple C<sub>4</sub> Enzymes in  
769 Gynandropsis gynandra Mesophyll Cells. *The Plant Cell* **28**: 454-465
- 770 **Wingler A, Robert PW, Zhi-Hui C, Leegood RC** (1999) Phosphoenolpyruvate Carboxykinase Is  
771 Involved in the Decarboxylation of Aspartate in the Bundle Sheath of Maize. *Plant*  
772 *Physiology* **120**: 539-545
- 773 **Zhang J-Y, Lee Y-C, Torres-Jerez I, Wang M, Yin Y, Chou W-C, He J, Shen H, Srivastava AC,**  
774 **Pennacchio C, Lindquist E, Grimwood J, Schmutz J, Xu Y, Sharma M, Sharma R, Bartley**  
775 **LE, Ronald PC, Saha MC, Dixon RA, Tang Y, Udvardi MK** (2013) Development of an  
776 integrated transcript sequence database and a gene expression atlas for gene discovery  
777 and analysis in switchgrass (*Panicum virgatum* L.). *The Plant Journal* **74**: 160-173
- 778  
779

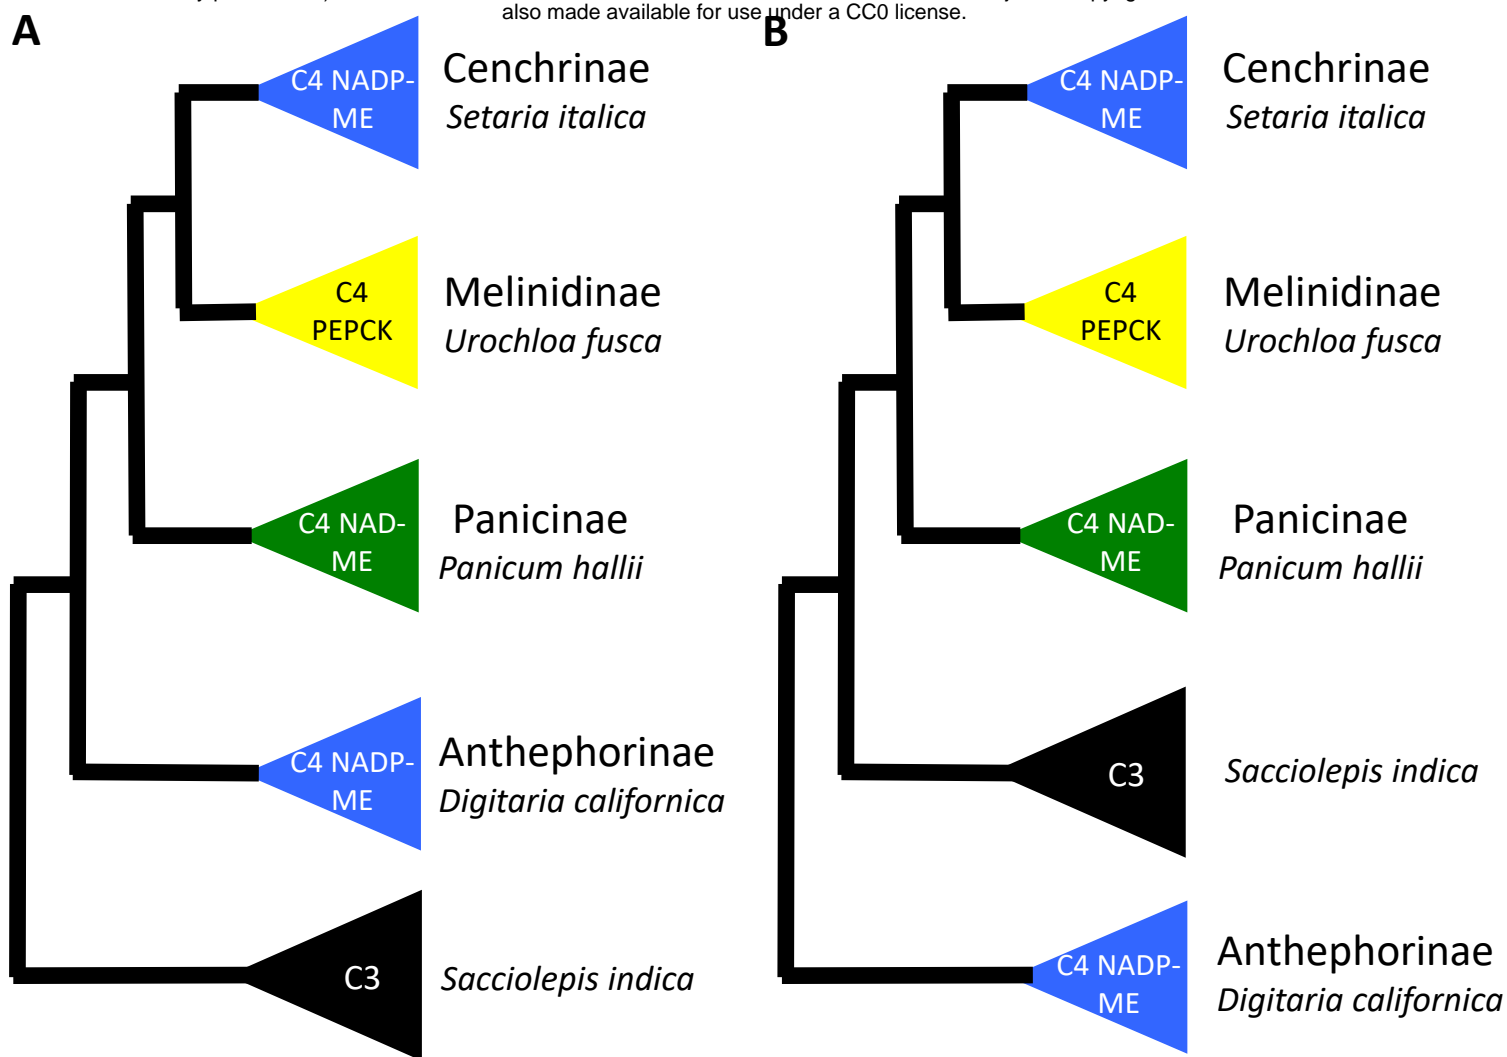

**Figure 1. Phylogenetic relationships between a subset of species in the grass tribe Paniceae (Poaceae).**

The photosynthetic type ( $C_3$  or  $C_4$ ) and  $C_4$  sub-type of each species is labeled in the colored triangle next to it. *NADP-ME* = *NADP-DEPENDENT MALIC ENZYME*, *PCK* = *PHOSPHONENOLPYRUVATE CARBOXYKINASE*, *NAD-ME* = *NAD-DEPENDENT MALIC ENZYME*. A) Phylogeny based on nuclear genes (Vicentini et al. 2008 and Washburn et al. 2017). B) Phylogeny based on chloroplast genes (Washburn et al. 2015).

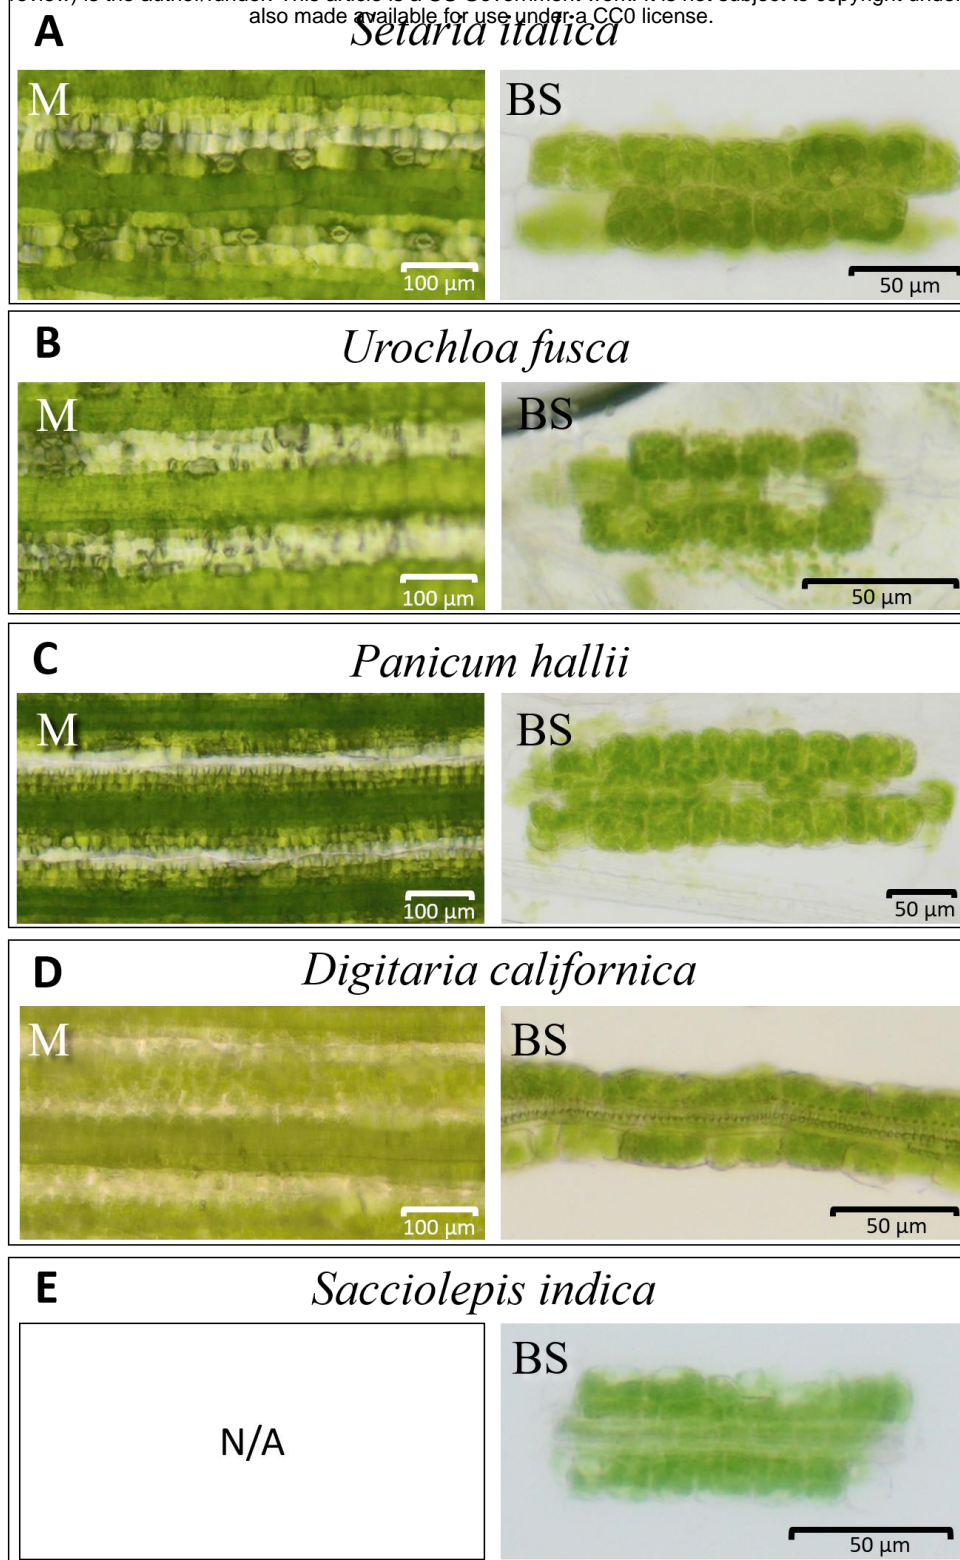

**Figure 2. Representative whole leaf and bundle strands.**

Images from leaves that have been rolled to remove mesophyll (M) contents or bundle sheath (BS) strands after isolation. A) *Setaria italica*, B) *Urochloa fusca*, C) *Panicum hallii*, D) *Digitaria californica*, E) *Sacciolepis indica*. All species use the  $C_4$  pathway except E, *Sacciolepis indica* which is a  $C_3$  plant. The bands of cells with low chlorophyll content in M images represent the position of mesophyll cells that have collapsed and had their contents expelled during the rolling procedure. Scale bars are depicted.

### A. Mesophyll

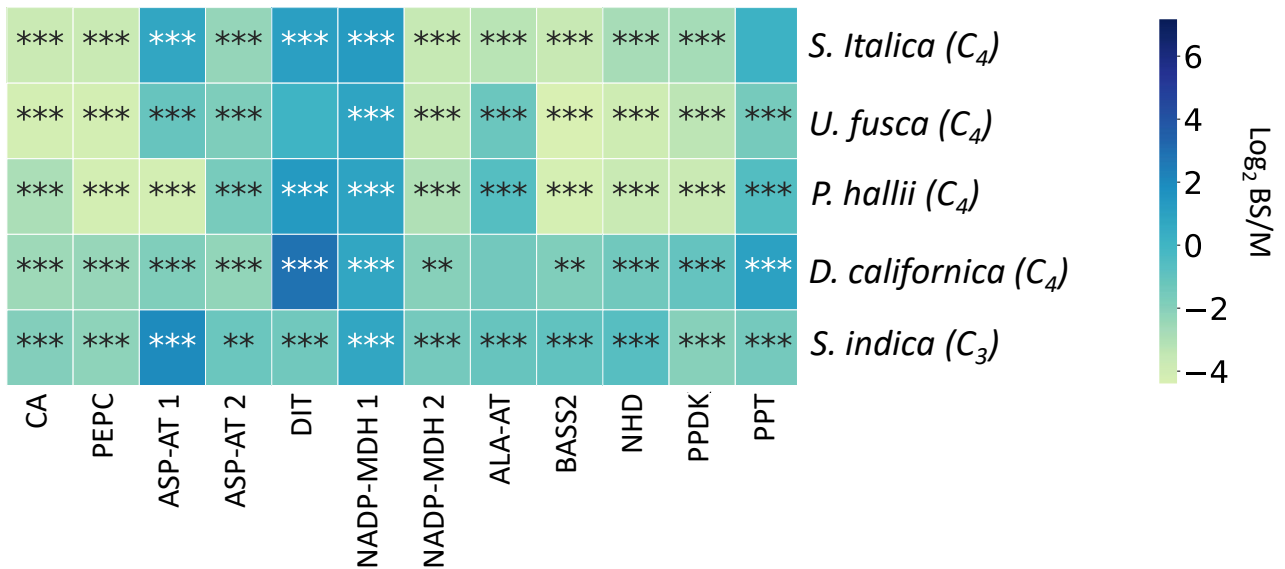

### B. Bundle Sheath

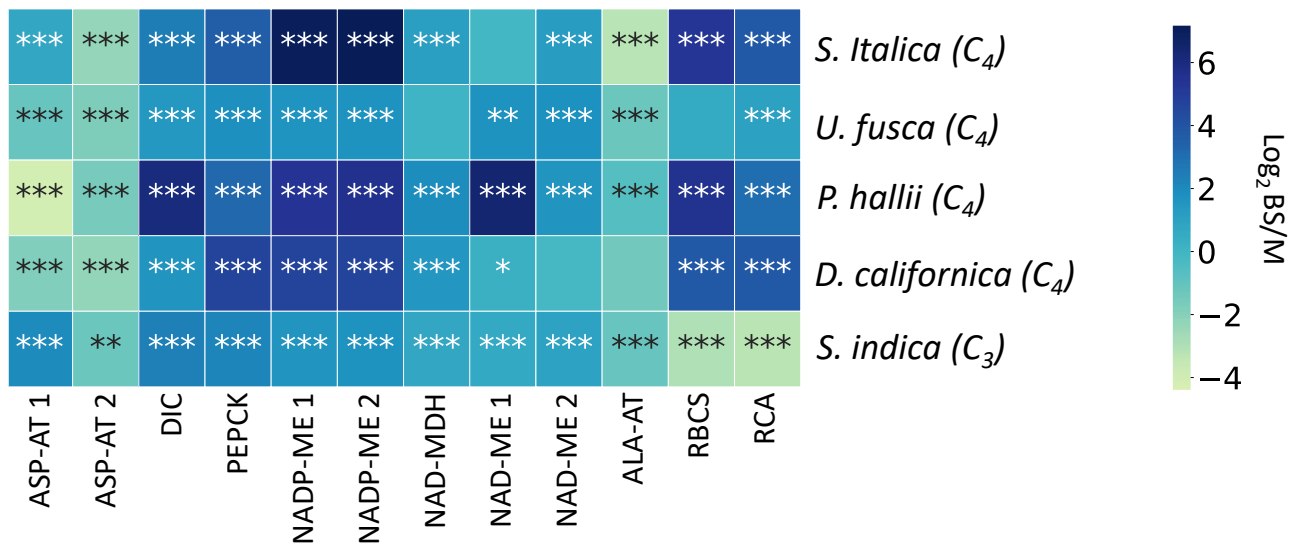

**Figure 3. Log<sub>2</sub> fold change between mesophyll (M) and bundle sheath (BS) enriched mRNA transcripts.** Species used are *Setaria italica*, *Urochloa fusca*, *Panicum hallii* and *Digitaria californica*, and *Sacciolepis indica*. Note that for *S. indica*, a  $C_3$  species, whole leaf data is used in place of M. Genes depicted encode proteins of the core  $C_4$  cycle that are known to be preferentially expressed in either: A) M, or B) BS cells. The number of asterisks in each box represents the p-value. \*\*\*  $p < 0.001$ , \*\*  $p < 0.01$ , \*  $p < 0.05$ . CA = CARBONIC ANHYDRASE, PEPC = PHOSPHOENOLPYRUVATE CARBOXYLASE, NADP-MDH = NADP-DEPENDENT MALATE DEHYDROGENASE, PPDK = PYRUVATE, ORTHOPHOSPHATE DIKINASE, NADP-ME = NADP-DEPENDENT MALIC ENZYME, PEPCK = PHOSPHONENOLPYRUVATE CARBOXYKINASE, NAD-ME = NAD-DEPENDENT MALIC ENZYME, NAD-MDH = NADP-DEPENDENT MALATE DEHYDROGENASE, RCA = RUBISCO ACTIVASE, RBCS = RUBISCO SMALL SUBUNIT, ASP-AT = ASPARAGINE-AMINOTRANSFERASE, and ALA-AT = ALANINE-AMINO TRANSFERASE. DIT = DICARBOXYLATE TRANSPORTER 1, BASS2 = SODIUM BILE ACID SYMPORTER 2, NHD = SODIUM:HYDROGEN ANTIPTORER, DIC = MITOCHONDRIAL DICARBOXYLATE CARRIER, PPT = PHOSPHATE/PHOSPHOENOLPYRUVATE TRANSLOCATOR. The addition of a space and a number after the enzyme name indicates that multiple genes were mapped that may perform this function.



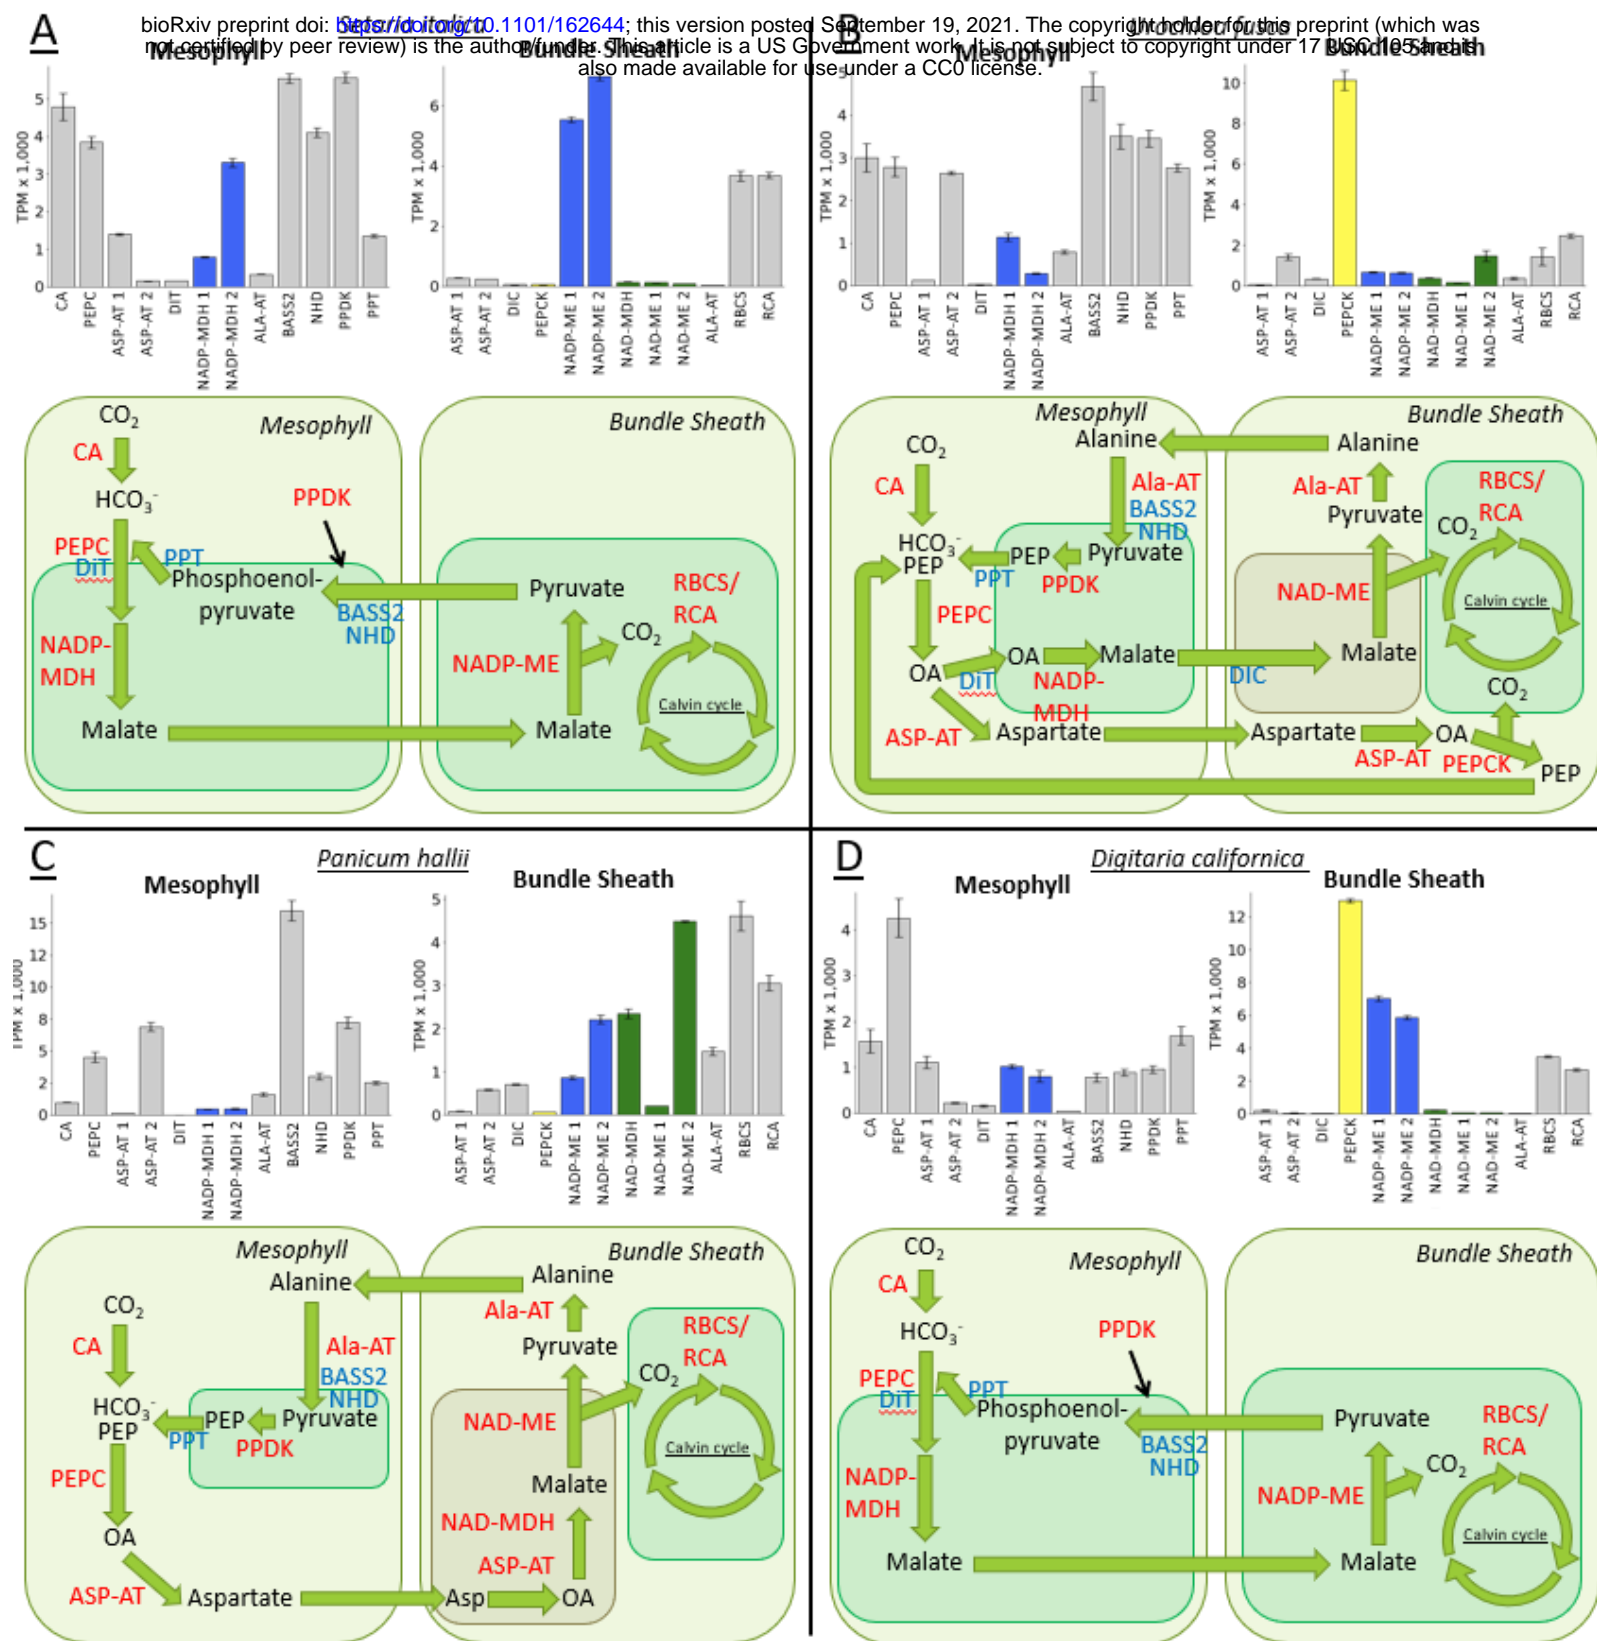

**Figure 4. Relative transcript abundance between core  $C_4$  enzymes within mesophyll (M) and bundle sheath (BS) extracts.** Data is displayed for: A) *Setaria italica*, B) *Urochloa fusca*, C) *Panicum hallii*, and D) *Digitaria californica*. The schematics below each histogram indicate the enzyme complement with each of the three biochemical subtypes. CA = CARBONIC ANHYDRASE, PEPC = PHOSPHOENOLPYRUVATE CARBOXYLASE, NADP-MDH = NADP-DEPENDENT MALATE DEHYDROGENASE, PPK = PYRUVATE, ORTHOPHOSPHATE DIKINASE, NADP-ME = NADP-DEPENDENT MALIC ENZYME, PEPCK = PHOSPHOENOLPYRUVATE CARBOXYKINASE, NAD-ME = NAD-DEPENDENT MALIC ENZYME, NAD-MDH = NADP-DEPENDENT MALATE DEHYDROGENASE, RCA = RUBISCO ACTIVASE, RBCS = RUBISCO SMALL SUBUNIT, ASP-AT = ASPARAGINE-AMINOTRANSFERASE, and ALA-AT = ALANINE-AMINO TRANSFERASE. DIT = DICARBOXYLATE TRANSPORTER 1, BASS2 = SODIUM BILE ACID SYMPORTER 2, NHD = SODIUM:HYDROGEN ANTIPTORER, DIC = MITOCHONDRIAL DICARBOXYLATE CARRIER, PPT = PHOSPHATE/PHOSPHOENOLPYRUVATE TRANSLOCATOR. The addition of a space and a number after the enzyme name indicates that multiple genes were mapped that may perform this function. Error bars are plus or minus the standard error across replicates.



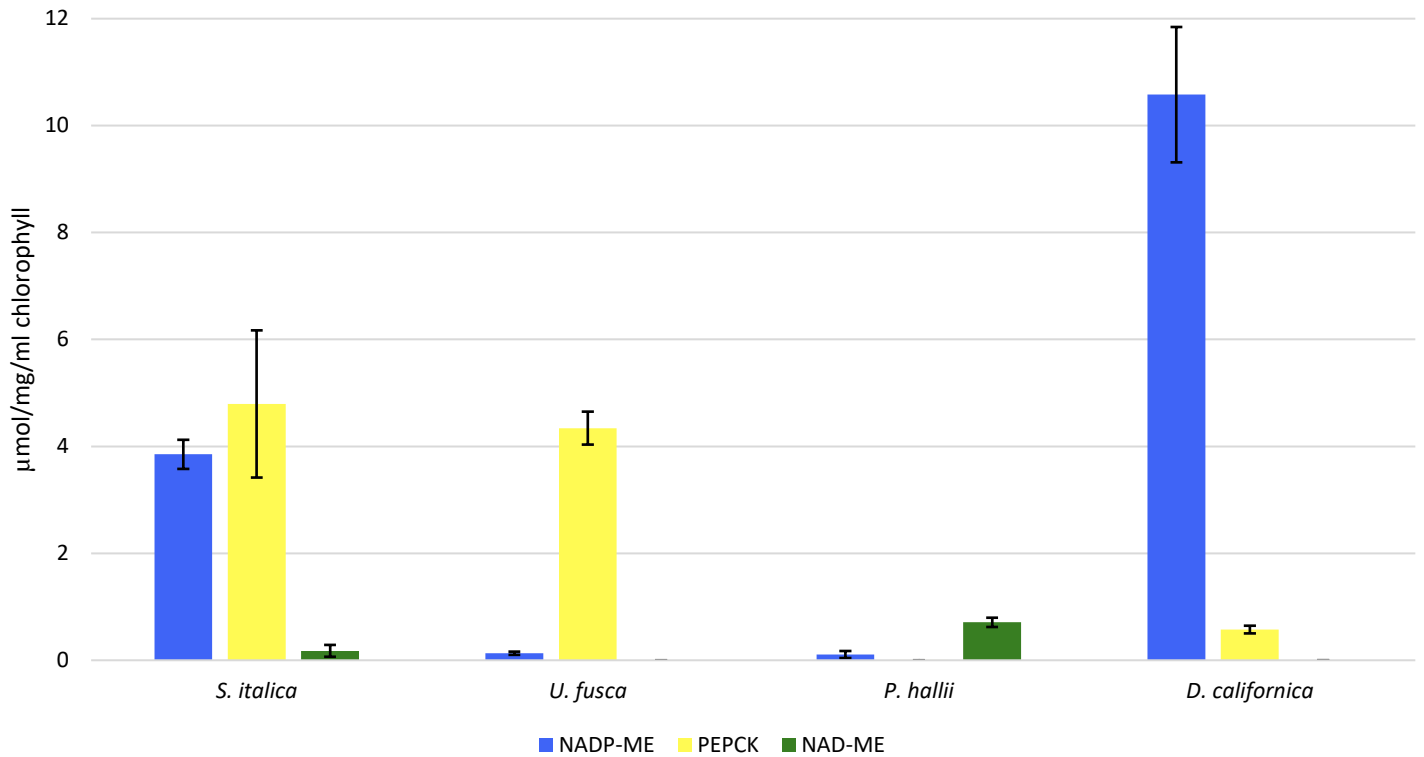

**Figure 5. Enzyme activities of C<sub>4</sub> decarboxylases. *NADP-DEPENDENT MALIC ENZYME (NADP-ME)*, *PHOSPHOENOLPYRUVATE CARBOXYKINASE (PEPCK)*, and *NAD-DEPENDENT MALIC ENZYME (NAD-ME)* for *Setaria italica*, *Urochloa fusca*, *Panicum hallii*, and *Digitaria californica*. Error bars represent plus or minus the standard error across replicates.**

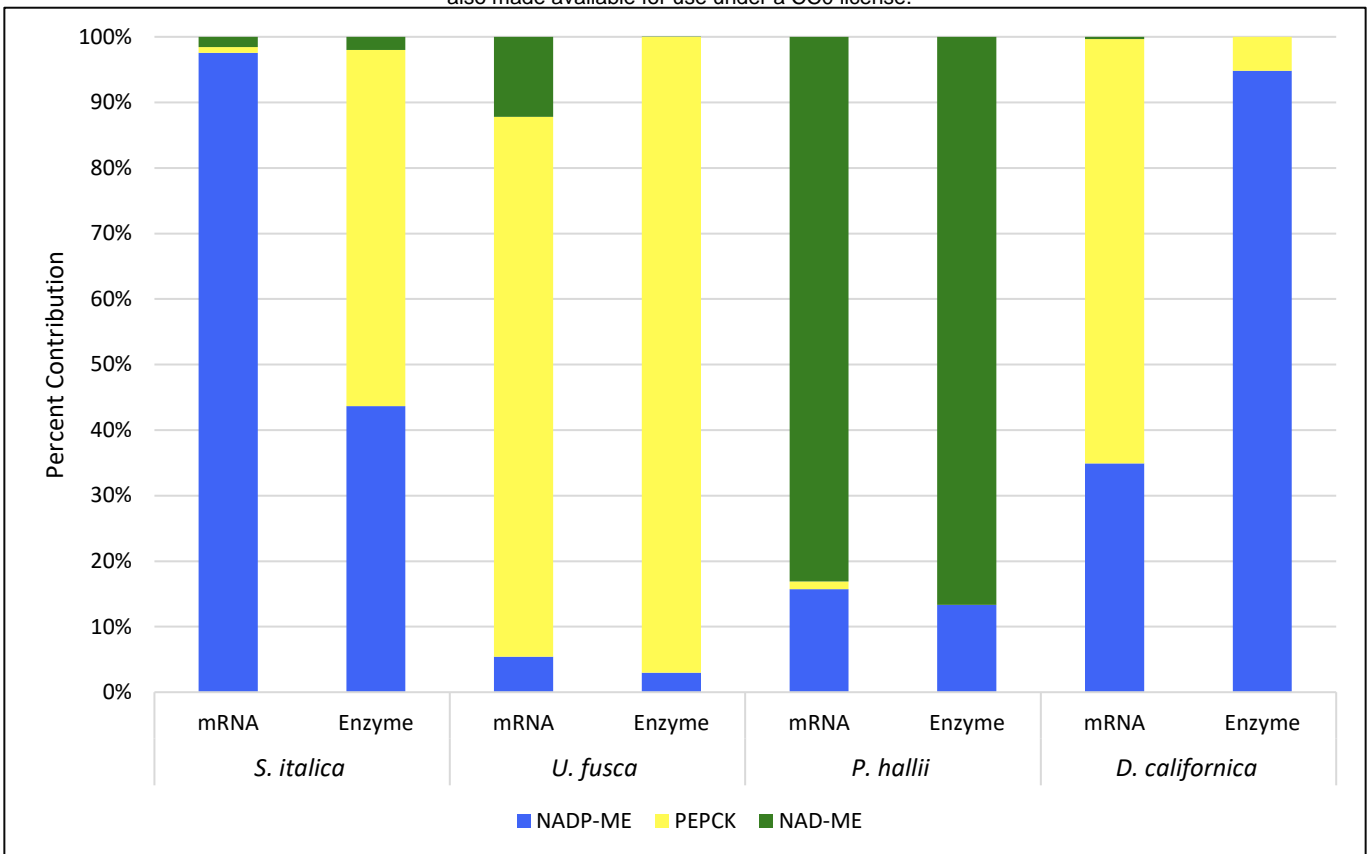

**Figure 6. Relative transcript accumulation and enzyme activities of  $C_4$  decarboxylases.** *NADP-DEPENDENT MALIC ENZYME (NADP-ME)*, *PHOSPHOENOLPYRUVATE CARBOXYKINASE (PEPCK)*, and *NAD-DEPENDENT MALIC ENZYME (NAD-ME)* transcript accumulation and enzyme activities for *Setaria italica*, *Urochloa fusca*, *Panicum hallii*, and *Digitaria californica*. Values are represented as a percentage of the total of all three decarboxylase values. Enzyme and mRNA data were not collected at the same time, but under closely matching environmental conditions.

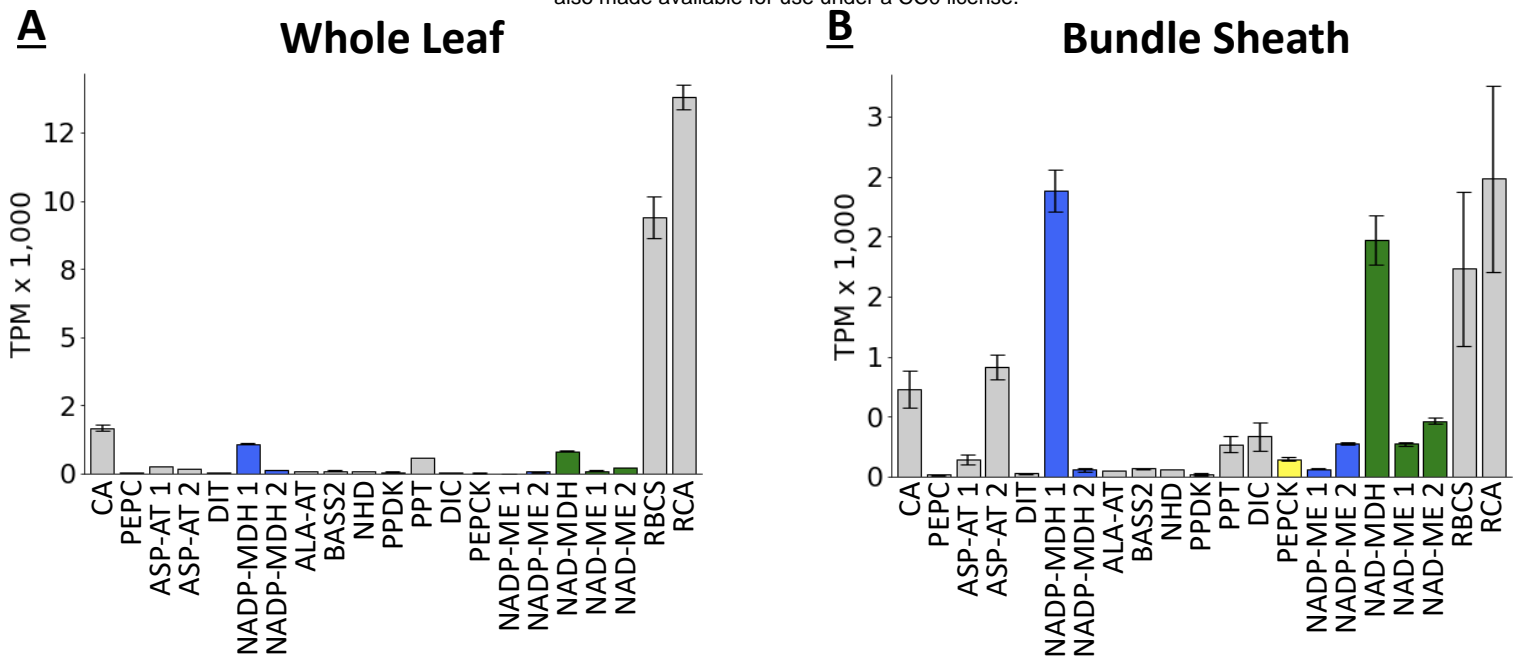

**Figure 7. Relative transcript abundance between core C<sub>4</sub> enzymes within whole leaf and bundle sheath (BS) extracts from *Saccolipis indica*.** A) Whole leaf, B) Bundle sheath. CA = CARBONIC ANHYDRASE, PEPC = PHOSPHOENOLPYRUVATE CARBOXYLASE, NADP-MDH = NADP-DEPENDENT MALATE DEHYDROGENASE, PPK = PYRUVATE, ORTHOPHOSPHATE DIKINASE, NADP-ME = NADP-DEPENDENT MALIC ENZYME, PEPCK = PHOSPHONENOLPYRUVATE CARBOXYKINASE, NAD-ME = NAD-DEPENDENT MALIC ENZYME, NAD-MDH = NADP-DEPENDENT MALATE DEHYDROGENASE, RCA = RUBISCO ACTIVASE, RBCS = RUBISCO SMALL SUBUNIT, ASP-AT = ASPARAGINE-AMINOTRANSFERASE, and ALA-AT = ALANINE-AMINO TRANSFERASE. DIT = DICARBOXYLATE TRANSPORTER 1, BASS2 = SODIUM BILE ACID SYMPORTER 2, NHD = SODIUM:HYDROGEN ANTIPORTER, DIC = MITOCHONDRIAL DICARBOXYLATE CARRIER, PPT = PHOSPHATE/PHOSPHOENOLPYRUVATE TRANSLOCATOR. The addition of a space and a number after the enzyme name indicates that multiple genes were mapped that may perform this function. Error bars are plus or minus the standard error across replicates.
