# Supplementary material for: Distinct C4 Sub-Types and C3 Bundle Sheath Isolation In The Paniceae Grasses
Source: bioRxiv or medRxiv preprint supplement (doi:10.1101/162644), 2021-09-19
Supplement: Supplementary file [file 162644-1.pdf]

## **Supplemental Material S1: Leaf Rolling and Bundle Sheath Protocol**

Modified by Jacob Washburn from Sheen (1995), Covshoff et al. (2013), and John et al. (2014)

### Preparation

- 1) Treat glass plate with 0.1 N NaOH for >30 min and rinse with deionized water.  
**Or** Clean plate with soap and water, then clean well with RNASE away.
- 2) Fit glass plate on a box of ice and allow to cool before beginning procedure.
- 3) Put 500µl of Lysis Buffer from the PureLink RNA mini kit into a 2ml round bottom tube and place on ice.
- 4) Place 50ml of Bundle Sheath Buffer 1 into a 50ml tube and place on ice.
- 5) Wash rolling device (25 ml pipette or wall paper roller) and glass plate with RNASE away.
- 6) Be sure that both the roller and the glass are dry of RNASE away before proceeding. Glass may collect moisture from the air which is ok.

### Extraction

- 7) Harvest one leaf just above the ligule using a razor blade
- 8) Remove the leaf's midrib using razor.
- 9) Cut the leaf into ~3-5 cm strips using razor. Lay strips flat onto glass plate and line them up to make the rolling process efficient.
- 10) Quickly roll the first strip and collect the liquid (sap) released using a pipette (liquid may be on glass plate and/or roller). Immediately place the liquid in the lysis buffer tube and pipette up and down a few times to mix well. Note: sometimes it is helpful to pipette 5ul of lysis buffer onto the spot where the leaf liquid is in order to more easily capture it.
- 11) Cut rolled leaf strip into ~2mm by 2mm squares and place in Bundle Sheath buffer 1.
- 12) Repeat steps 10 and 11 for all remaining leaf strips on the glass plate.
- 13) Repeat steps 5-12 with all remaining leaf samples. Note: it is important to periodically check a rolled leaf strip under the microscope to insure that BS cells are remaining intact through the rolling process.

## Sample Processing

- 14) Leaf rolling extract, mixed with Lysis Buffer can be left on ice for a few hours while the BS extraction process is carried out. Once BS cells are placed in -80 for storage, proceed immediately to the remainder of the RNA extraction procedure for leaf rolled extract.
- 15) Place BS buffer 1 with the contained leaf pieces into a blender.
- 16) Pulse on low for 10 seconds. When the spin comes down pulse again for 10 seconds (for a total of 3 pulses)
- 17) Filter through a 60  $\mu$ M mesh (Millipore). Use a small metal spatula to gently stir the leaf bits off the mesh to facilitate drainage. (To make the filter apparatus, cut a 50 ml Falcon tube in half and cut out the center of the cap. Place the mesh in the cap and screw onto the tube.)
- 18) Pour about 80-100ml of BS Buffer 2 back through the net to return the leaf debris to the blender. Make sure to add enough buffer to just cover the blender blades.
- 19) Blend at high speed for one minute.
- 20) Filter through mesh as in step 5, eluting into beta-mercaptoethanol waste.
- 21) Repeat steps 18-20 two more times
- 22) After the final filtration, unscrew the filter from the tube and lay the filter (with BS cells) on a few paper towels to wick away excess moisture. Wrap in a foil packet and drop into liquid nitrogen. Store in -80 freezer until ready to extract RNA using a standard mortar and pestle method.

## **References**

- Covshoff S, Furbank RT, Leegood RC, Hibberd JM** (2013) Leaf rolling allows quantification of mRNA abundance in mesophyll cells of sorghum. *Journal of Experimental Botany* **64**: 807-813
- John CR, Smith-Unna RD, Woodfield H, Covshoff S, Hibberd JM** (2014) Evolutionary Convergence of Cell-Specific Gene Expression in Independent Lineages of C4 Grasses. *Plant Physiology* **165**: 62-75
- Sheen J** (1995) Methods for mesophyll and bundle sheath cell separation. *In* DW Galbraith, HJ Bohnert, DP Bourque, eds, *Methods in Plant Cell Biology*, Vol 49. Academic Press, Orlando, pp 305-314
